# Supplementary material for: Normal percentile reference curves for skin ultrasound thickness and stiffness at Rodnan sites
Source: HighWire-hosted journal article supplement (doi:10.1136/rmdopen-2022-002577), 2022-11-01
Supplement: rmdopen-2022-002577supp001_data_supplement.pdf [file rmdopen-2022-002577supp001_data_supplement.pdf]

**Supplementary text 6 - Figures.****a) Percentile normality curves for ultrasound-dermal thickness in females and males.**

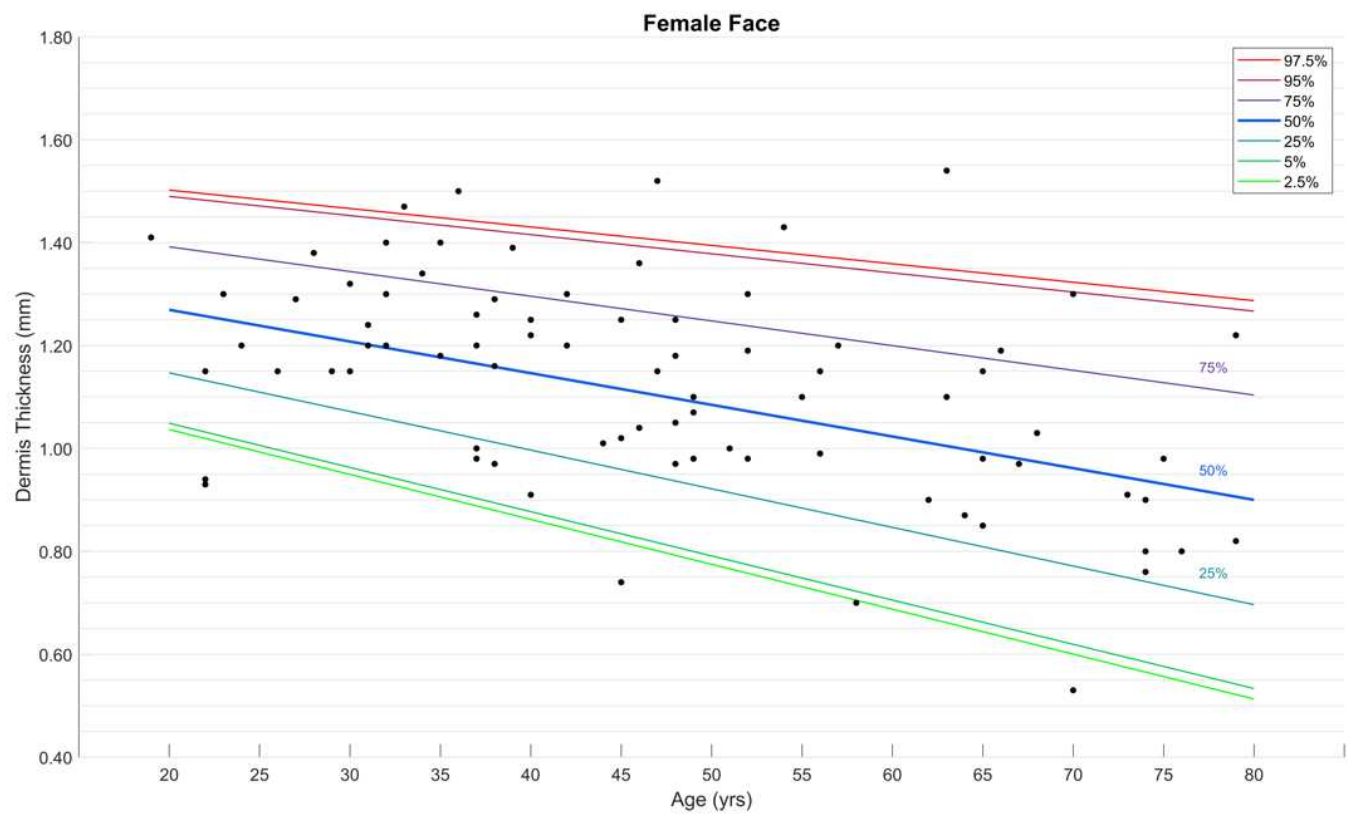

| Percentiles        | General equation for the estimate of the value for thickness (at age X) | R <sup>2</sup> |
|--------------------|-------------------------------------------------------------------------|----------------|
| 2,5 <sup>th</sup>  | 1.21 - 0,009 (X)                                                        | 0,884          |
| 5 <sup>th</sup>    | 1.22 - 0,009 (X)                                                        | 0,883          |
| 25 <sup>th</sup>   | 1,29 - 0,008 (X)                                                        | 0,867          |
| 50 <sup>th</sup>   | 1,39 - 0,006 (X)                                                        | 0,837          |
| 75 <sup>th</sup>   | 1,48 - 0,005 (X)                                                        | 0,781          |
| 95 <sup>th</sup>   | 1,56 + 0,004 (X)                                                        | 0,698          |
| 97.5 <sup>th</sup> | 1,57 - 0,004 (X)                                                        | 0,684          |

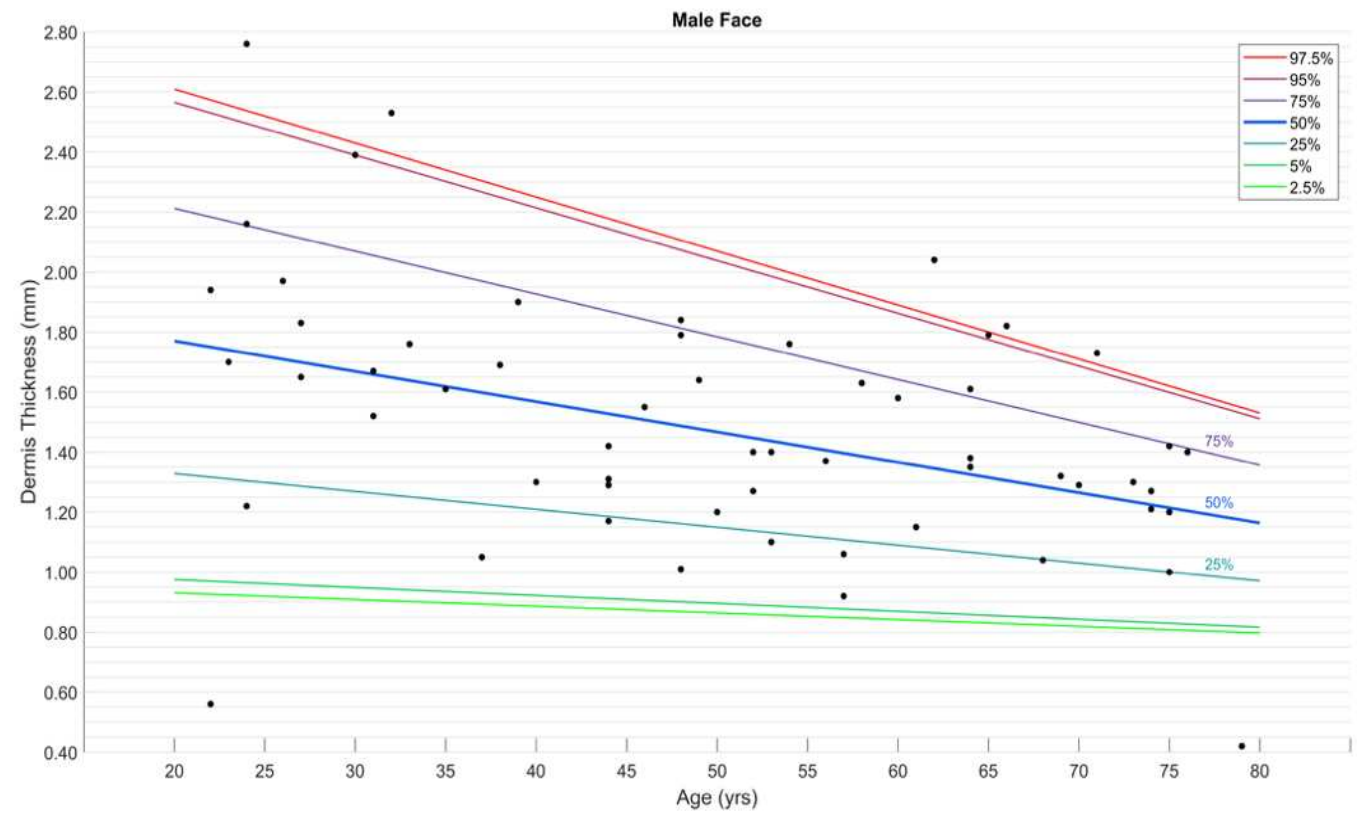

| Percentiles        | General equation for the estimate of the value for thickness (at age X) | R <sup>2</sup> |
|--------------------|-------------------------------------------------------------------------|----------------|
| 2,5 <sup>th</sup>  | 0.975 - 0,002 (X)                                                       | 0,083          |
| 5 <sup>th</sup>    | 1.028 - 0,003 (X)                                                       | 0,121          |
| 25 <sup>th</sup>   | 1.447 - 0,006 (X)                                                       | 0,526          |
| 50 <sup>th</sup>   | 1,972 - 0,010 (X)                                                       | 0,715          |
| 75 <sup>th</sup>   | 2.497 - 0,014 (X)                                                       | 0,705          |
| 95 <sup>th</sup>   | 2.917 - 0,018 (X)                                                       | 0,679          |
| 97.5 <sup>th</sup> | 2.969 - -0,018 (X)                                                      | 0,676          |

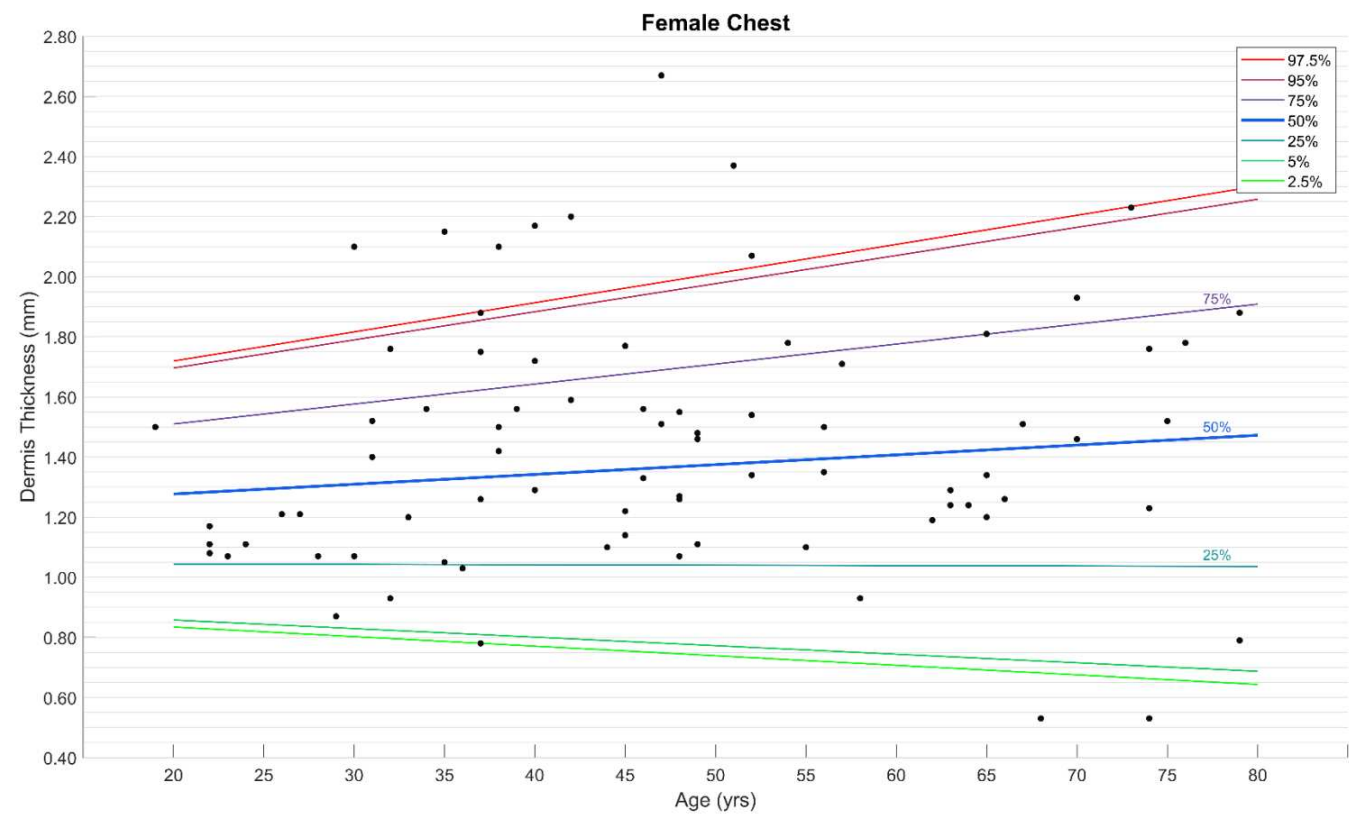

| Percentiles        | General equation for the estimate of the value for thickness (at age X) | R <sup>2</sup> |
|--------------------|-------------------------------------------------------------------------|----------------|
| 2,5 <sup>th</sup>  | 0.898 - 0,003 (X)                                                       | 0,456          |
| 5 <sup>th</sup>    | 0.915 - 0,003 (X)                                                       | 0,406          |
| 25 <sup>th</sup>   | 1.047 + 0,003 (X)                                                       | 0,001          |
| 50 <sup>th</sup>   | 1,212 + 0,003 (X)                                                       | 0,130          |
| 75 <sup>th</sup>   | 1.377 + 0,007 (X)                                                       | 0,221          |
| 95 <sup>th</sup>   | 1.509 + 0,009 (X)                                                       | 0,259          |
| 97.5 <sup>th</sup> | 1.526 + 0,01 (X)                                                        | 0,456          |

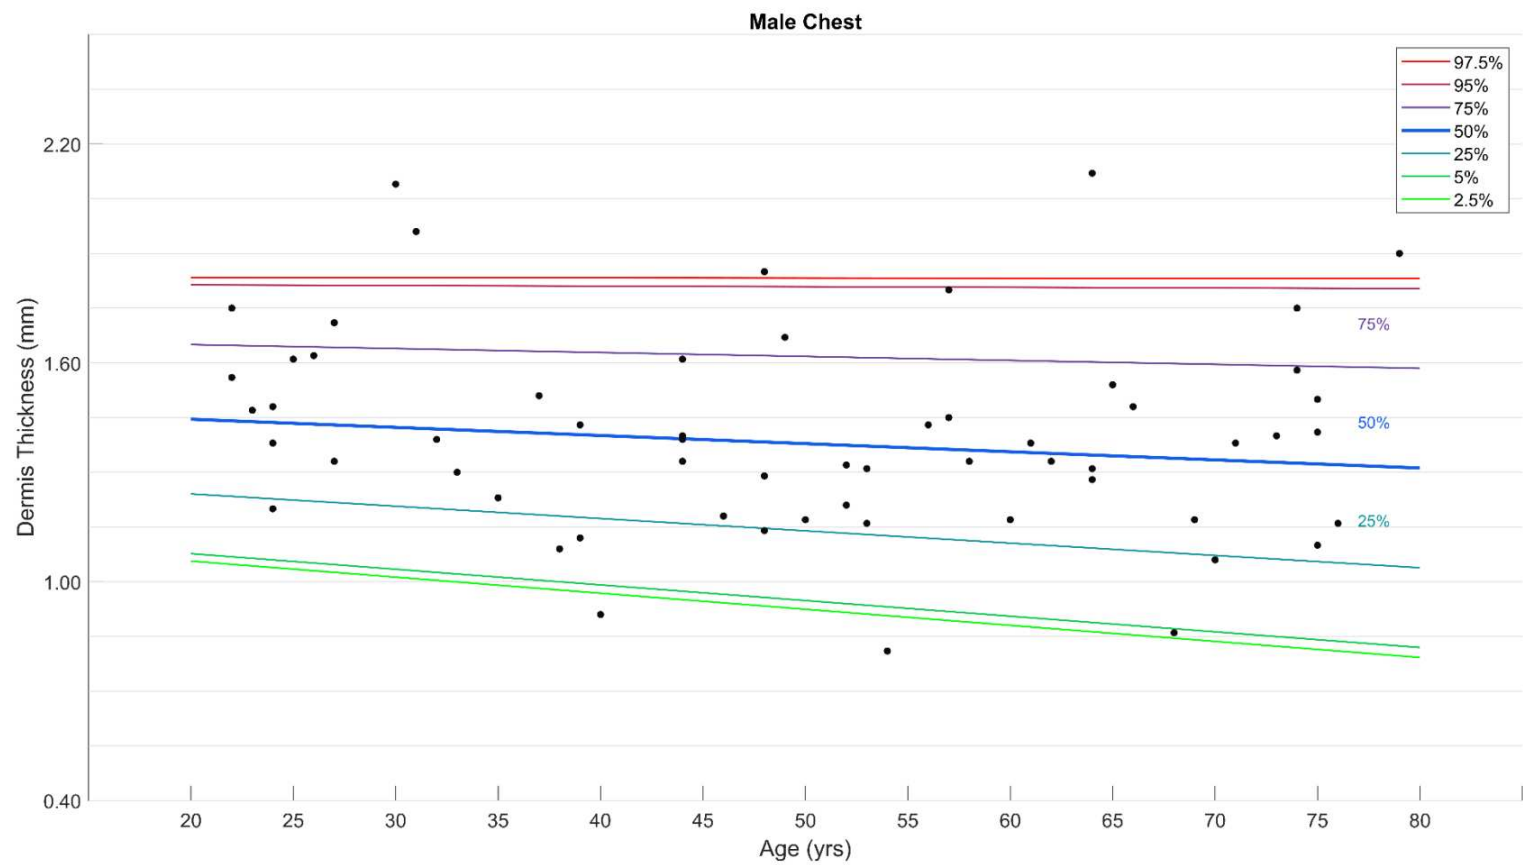

| Percentiles        | General equation for the estimate of the value for thickness (at age X) | R <sup>2</sup> |
|--------------------|-------------------------------------------------------------------------|----------------|
| 2,5 <sup>th</sup>  | 1.145 - 0,004 (X)                                                       | 0,286          |
| 5 <sup>th</sup>    | 1.163 - 0,004 (X)                                                       | 0,290          |
| 25 <sup>th</sup>   | 1.308 - 0,003 (X)                                                       | 0,323          |
| 50 <sup>th</sup>   | 1.490 - 0.002 (X)                                                       | 0,312          |
| 75 <sup>th</sup>   | 1.672 - 0.001 (X)                                                       | 0,082          |
| 95 <sup>th</sup>   | 1.817 + 0.0001 (X)                                                      | 0,001          |
| 97.5 <sup>th</sup> | 1.835 + 0.0001 (X)                                                      | 0,0001         |

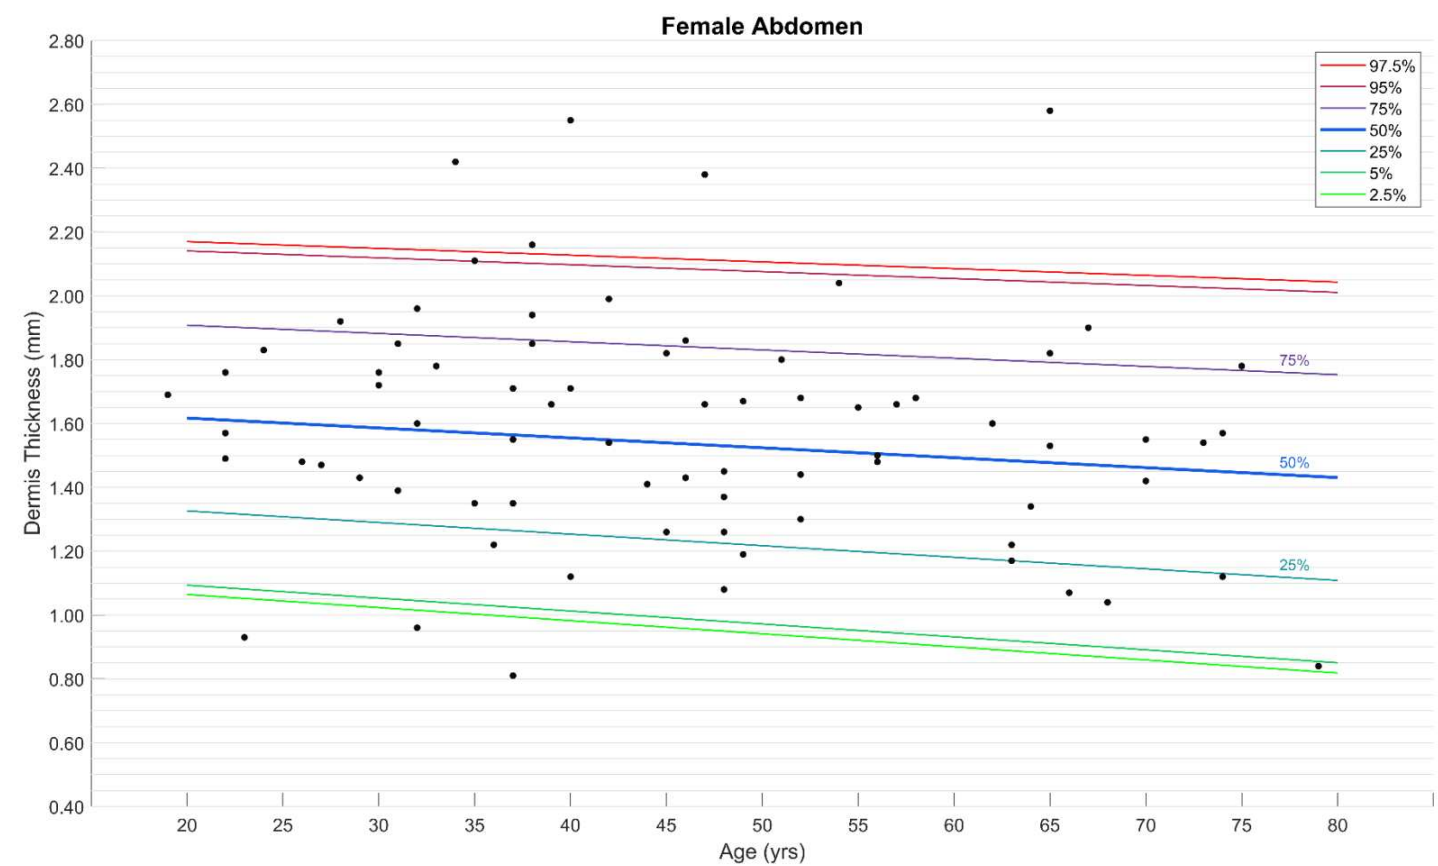

| Percentiles        | General equation for the estimate of the value for thickness (at age X) | R <sup>2</sup> |
|--------------------|-------------------------------------------------------------------------|----------------|
| 2,5 <sup>th</sup>  | 1.146 - 0,004 (X)                                                       | 0,116          |
| 5 <sup>th</sup>    | 1.174 - 0,004 (X)                                                       | 0,123          |
| 25 <sup>th</sup>   | 1.399 - 0,004 (X)                                                       | 0,214          |
| 50 <sup>th</sup>   | 1.679 - 0,003 (X)                                                       | 0,414          |
| 75 <sup>th</sup>   | 1.960 - 0,003 (X)                                                       | 0,156          |
| 95 <sup>th</sup>   | 2.184 - 0,002 (X)                                                       | 0,047          |
| 97.5 <sup>th</sup> | 2.212 - 0.002 (X)                                                       | 0,041          |

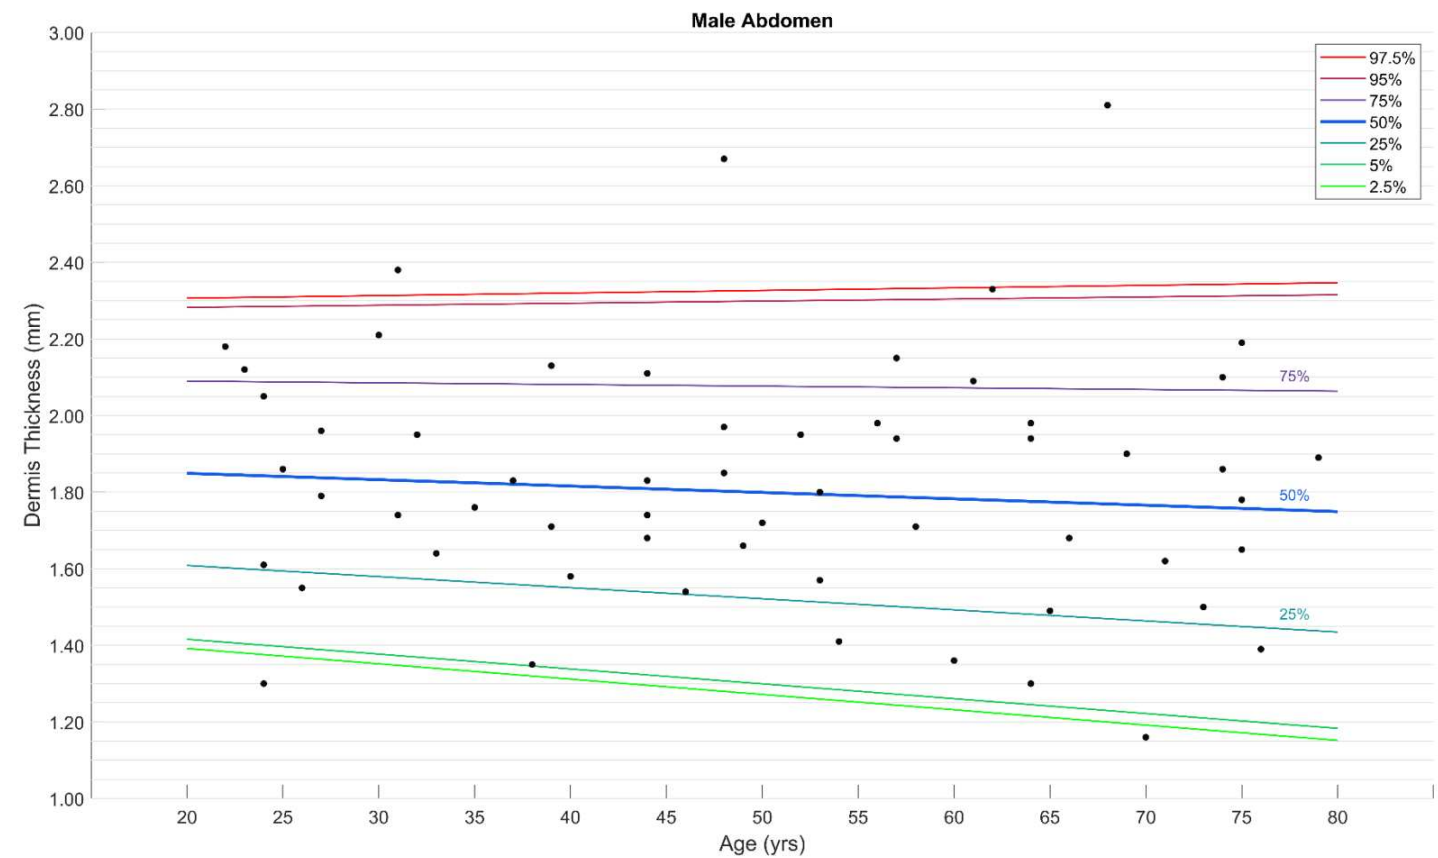

| Percentiles        | General equation for the estimate of the value for thickness (at age X) | R <sup>2</sup> |
|--------------------|-------------------------------------------------------------------------|----------------|
| 2,5 <sup>th</sup>  | 1.472 – 0.004 (X)                                                       | 0,313          |
| 5 <sup>th</sup>    | 1.493 – 0.004 (X)                                                       | 0,326          |
| 25 <sup>th</sup>   | 1.666 – 0.003 (X)                                                       | 0,468          |
| 50 <sup>th</sup>   | 1.882 – 0.002 (X)                                                       | 0,276          |
| 75 <sup>th</sup>   | 2.099 – 0.0001 (X)                                                      | 0,006          |
| 95 <sup>th</sup>   | 2.271 – 0.001 (X)                                                       | 0,004          |
| 97.5 <sup>th</sup> | 2.293 - 0.001 (X)                                                       | 0,006          |

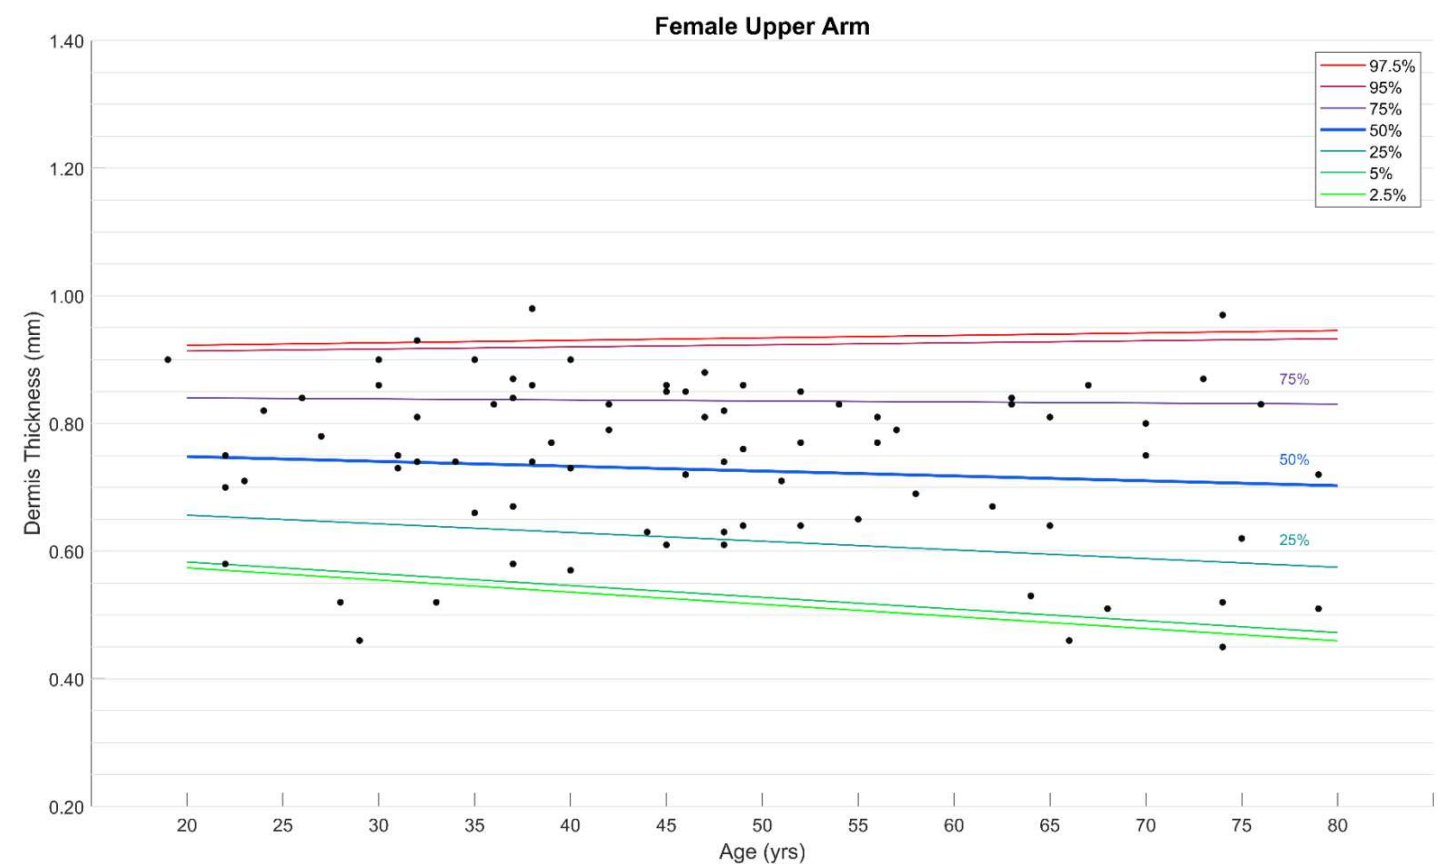

| Percentiles        | General equation for the estimate of the value for thickness (at age X) | R <sup>2</sup> |
|--------------------|-------------------------------------------------------------------------|----------------|
| 2,5 <sup>th</sup>  | 0.674 – 0.004 (X)                                                       | 0,63           |
| 5 <sup>th</sup>    | 0.679 – 0.004 (X)                                                       | 0,61           |
| 25 <sup>th</sup>   | 0.719 – 0.002 (X)                                                       | 0,39           |
| 50 <sup>th</sup>   | 0.768 – 0.001 (X)                                                       | 0,03           |
| 75 <sup>th</sup>   | 0.817 + 0,0001 (X)                                                      | 0,10           |
| 95 <sup>th</sup>   | 0.856 + 0.003 (X)                                                       | 0,28           |
| 97.5 <sup>th</sup> | 0.861 + 0.003 (X)                                                       | 0,29           |



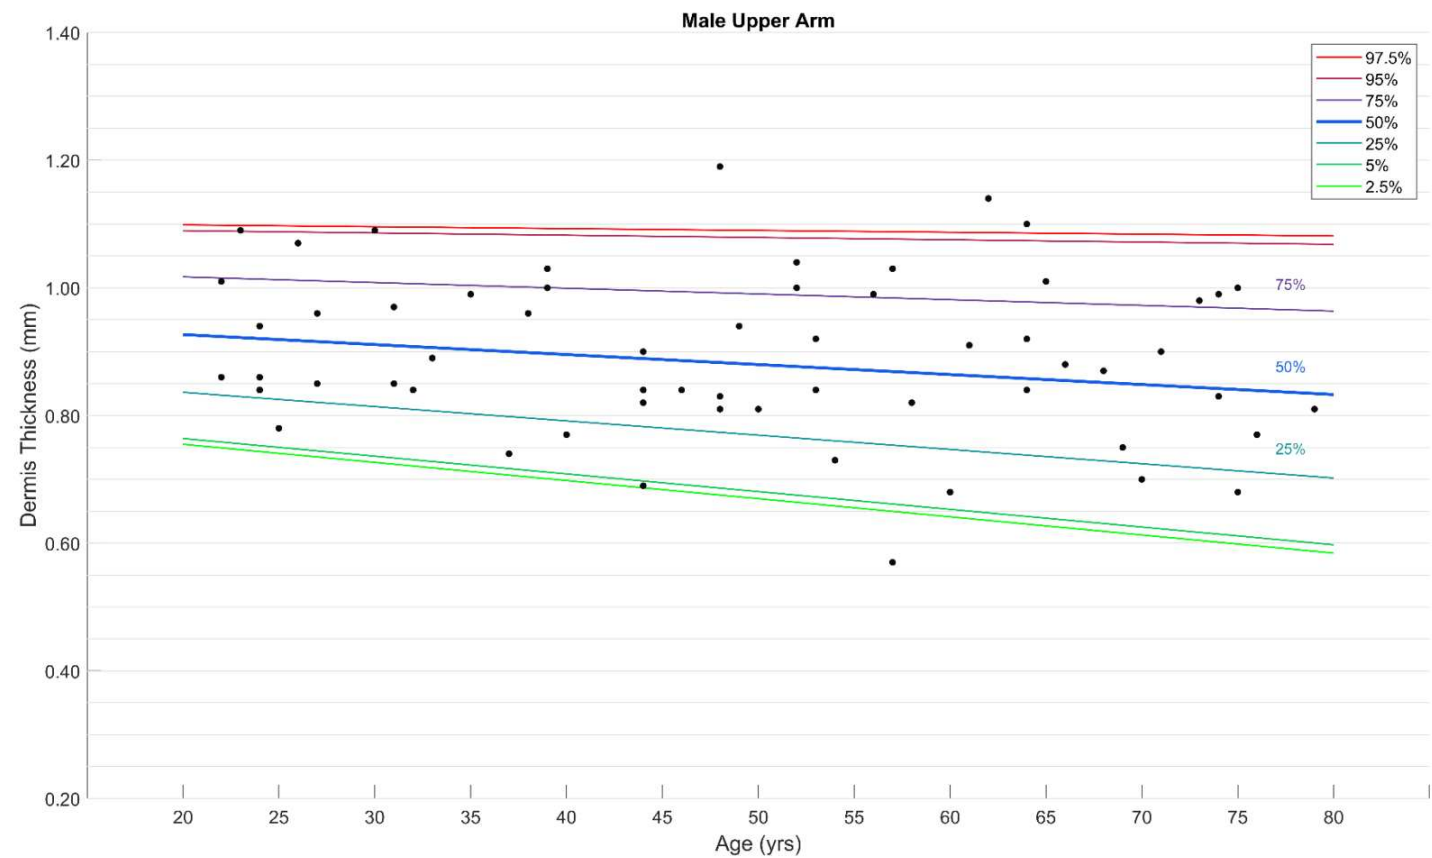

| Percentiles        | General equation for the estimate of the value for thickness (at age X) | R <sup>2</sup> |
|--------------------|-------------------------------------------------------------------------|----------------|
| 2,5 <sup>th</sup>  | 0.812 - 0,003 (X)                                                       | 0,65           |
| 5 <sup>th</sup>    | 0.82 - 0,003 (X)                                                        | 0,64           |
| 25 <sup>th</sup>   | 0.881 - 0,002 (X)                                                       | 0,62           |
| 50 <sup>th</sup>   | 0.958 - 0,002 (X)                                                       | 0,52           |
| 75 <sup>th</sup>   | 1.035 - 0,001 (X)                                                       | 0,29           |
| 95 <sup>th</sup>   | 1.097 + 0,0001 (X)                                                      | 0,06           |
| 97.5 <sup>th</sup> | 1.104 + 0,0001 (X)                                                      | 0,04           |

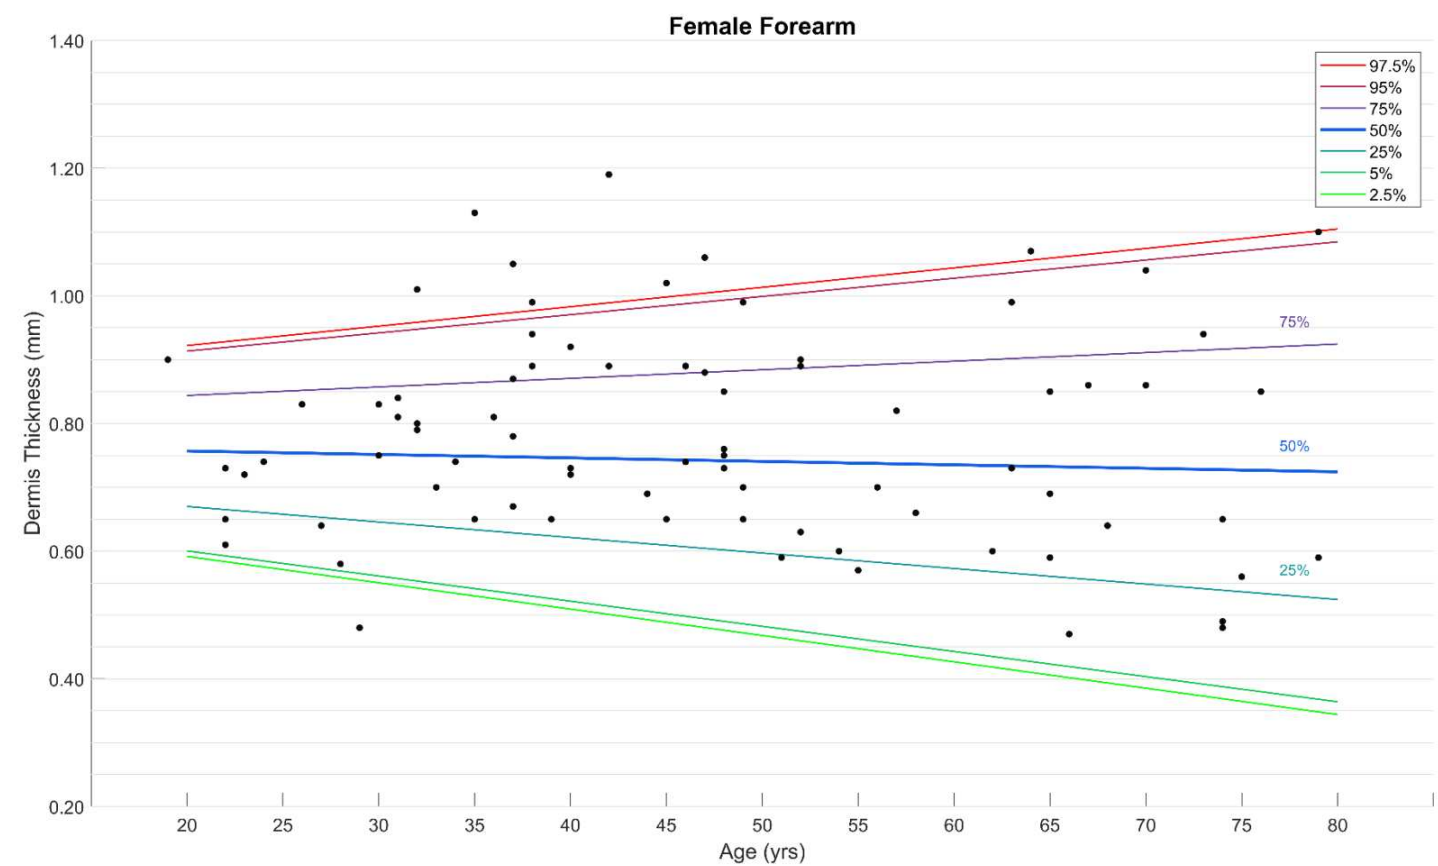

| Percentiles        | General equation for the estimate of the value for thickness (at age X) | R <sup>2</sup> |
|--------------------|-------------------------------------------------------------------------|----------------|
| 2,5 <sup>th</sup>  | 0.67 + 0.001 (X)                                                        | 0,63           |
| 5 <sup>th</sup>    | 0.68 + 0.001 (X)                                                        | 0,61           |
| 25 <sup>th</sup>   | 0.72 + 0.001 (X)                                                        | 0,39           |
| 50 <sup>th</sup>   | 0.77 + 0.001 (X)                                                        | 0,03           |
| 75 <sup>th</sup>   | 0.82 + 0.001 (X)                                                        | 0,11           |
| 95 <sup>th</sup>   | 0.86 + 0.001 (X)                                                        | 0,28           |
| 97.5 <sup>th</sup> | 0.86 + 0.001 (X)                                                        | 0,30           |

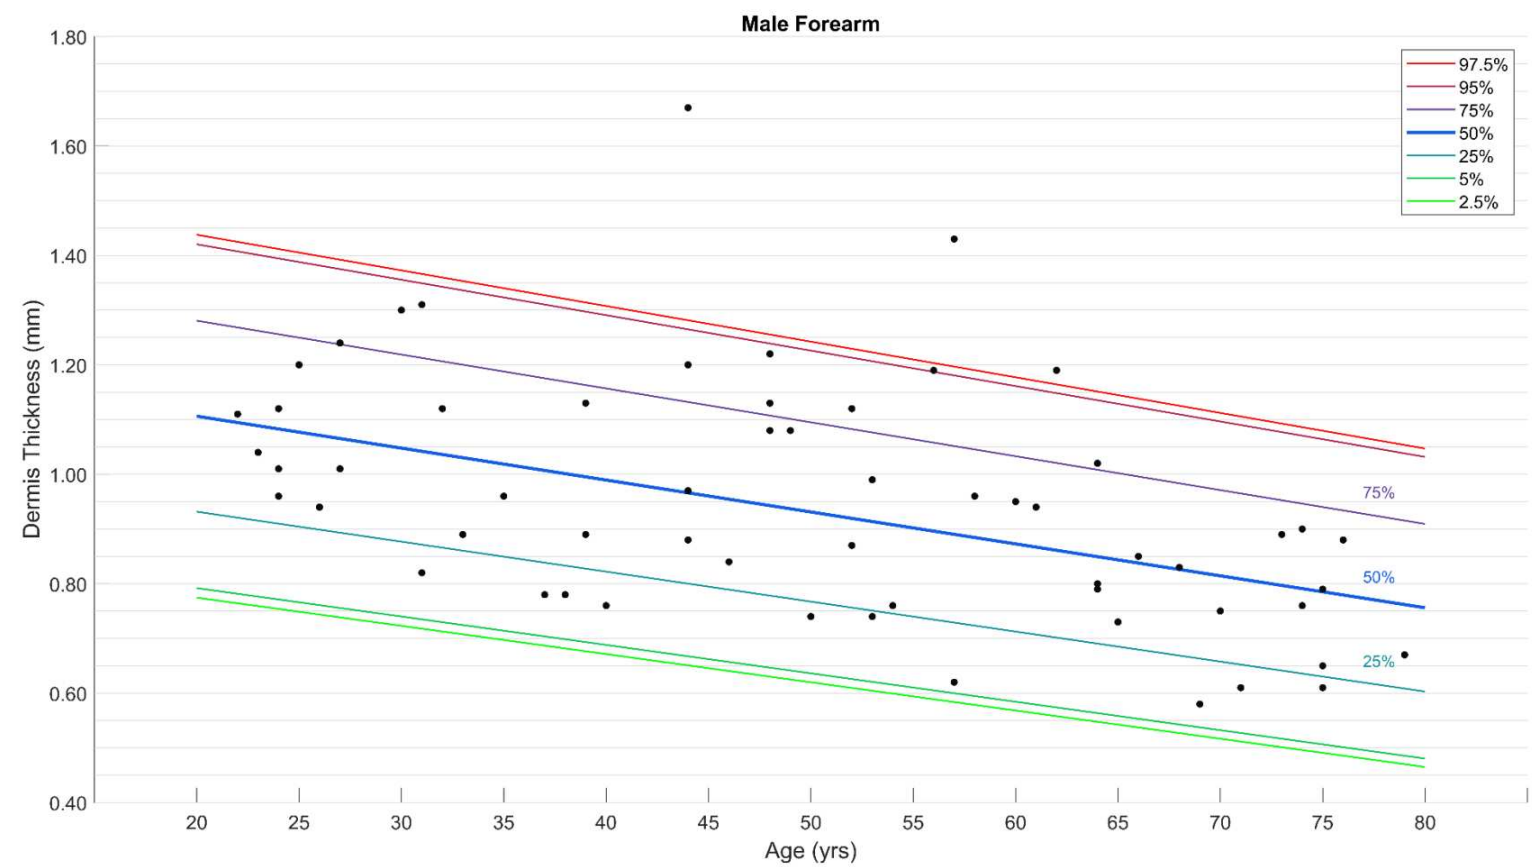

| Percentiles        | General equation for the estimate of the value for thickness (at age X) | R <sup>2</sup> |
|--------------------|-------------------------------------------------------------------------|----------------|
| 2,5 <sup>th</sup>  | 0.88 - 0,01 (X)                                                         | 0,52           |
| 5 <sup>th</sup>    | 0.90 - 0,01 (X)                                                         | 0,55           |
| 25 <sup>th</sup>   | 1.04 - 0,01 (X)                                                         | 0,77           |
| 50 <sup>th</sup>   | 1.22 - 0,01 (X)                                                         | 0,77           |
| 75 <sup>th</sup>   | 1.40 - 0,01 (X)                                                         | 0,55           |
| 95 <sup>th</sup>   | 1.55 - 0,01 (X)                                                         | 0,40           |
| 97.5 <sup>th</sup> | 1.57 - 0.01 (X)                                                         | 0,39           |

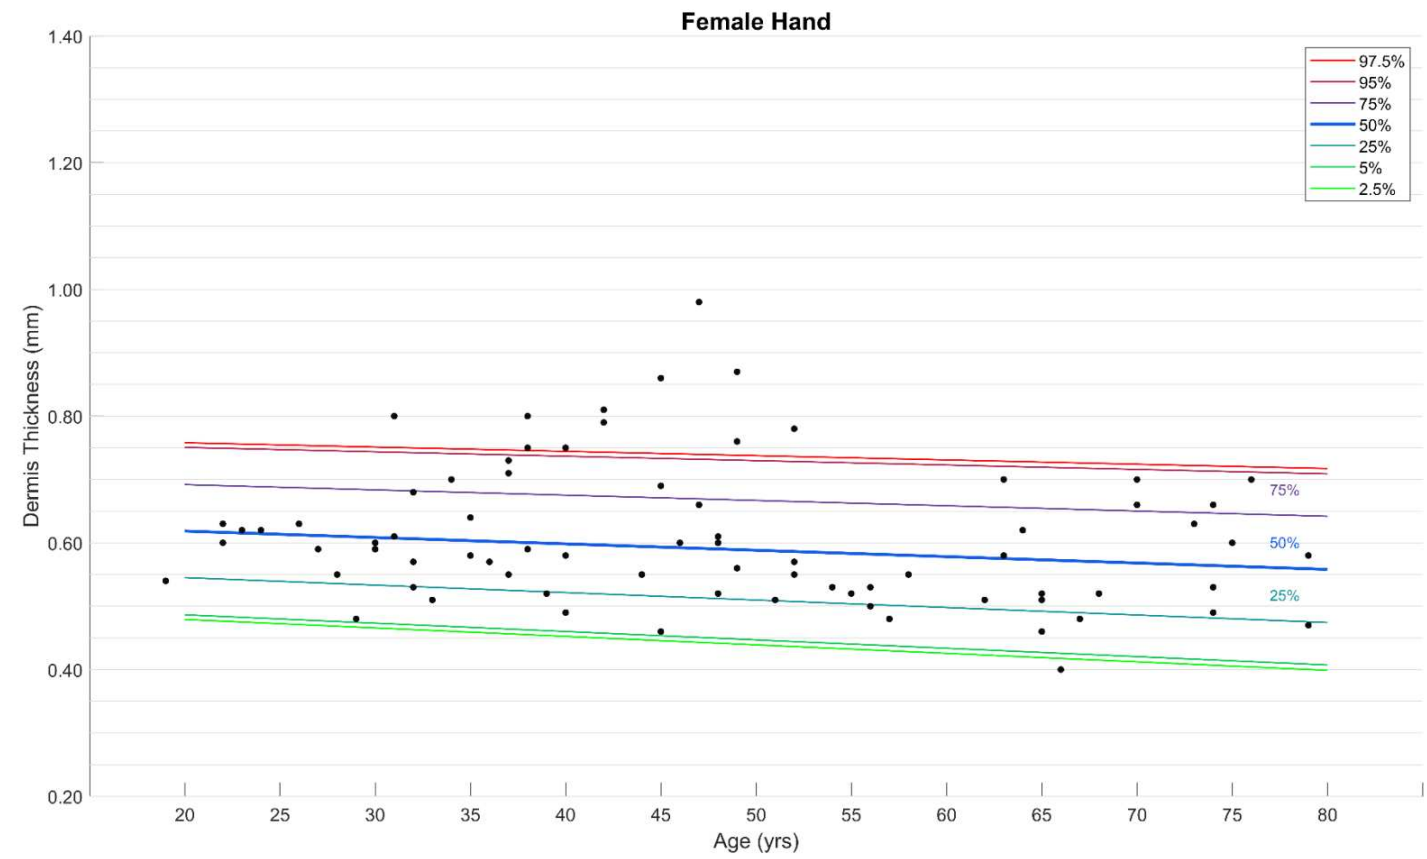

| Percentiles        | General equation for the estimate of the value for thickness (at age X) | R²   |
|--------------------|-------------------------------------------------------------------------|------|
| 2,5 <sup>th</sup>  | 0.51 - 0.01 (X)                                                         | 0,27 |
| 5 <sup>th</sup>    | 0.51 - 0.01 (X)                                                         | 0,29 |
| 25 <sup>th</sup>   | 0.57 - 0.01 (X)                                                         | 0,31 |
| 50 <sup>th</sup>   | 0.64 - 0.01 (X)                                                         | 0,16 |
| 75 <sup>th</sup>   | 0.71 - 0.01 (X)                                                         | 0,05 |
| 95 <sup>th</sup>   | 0.76 - 0.01 (X)                                                         | 0,02 |
| 97.5 <sup>th</sup> | 0.77 - 0.01 (X)                                                         | 0,02 |

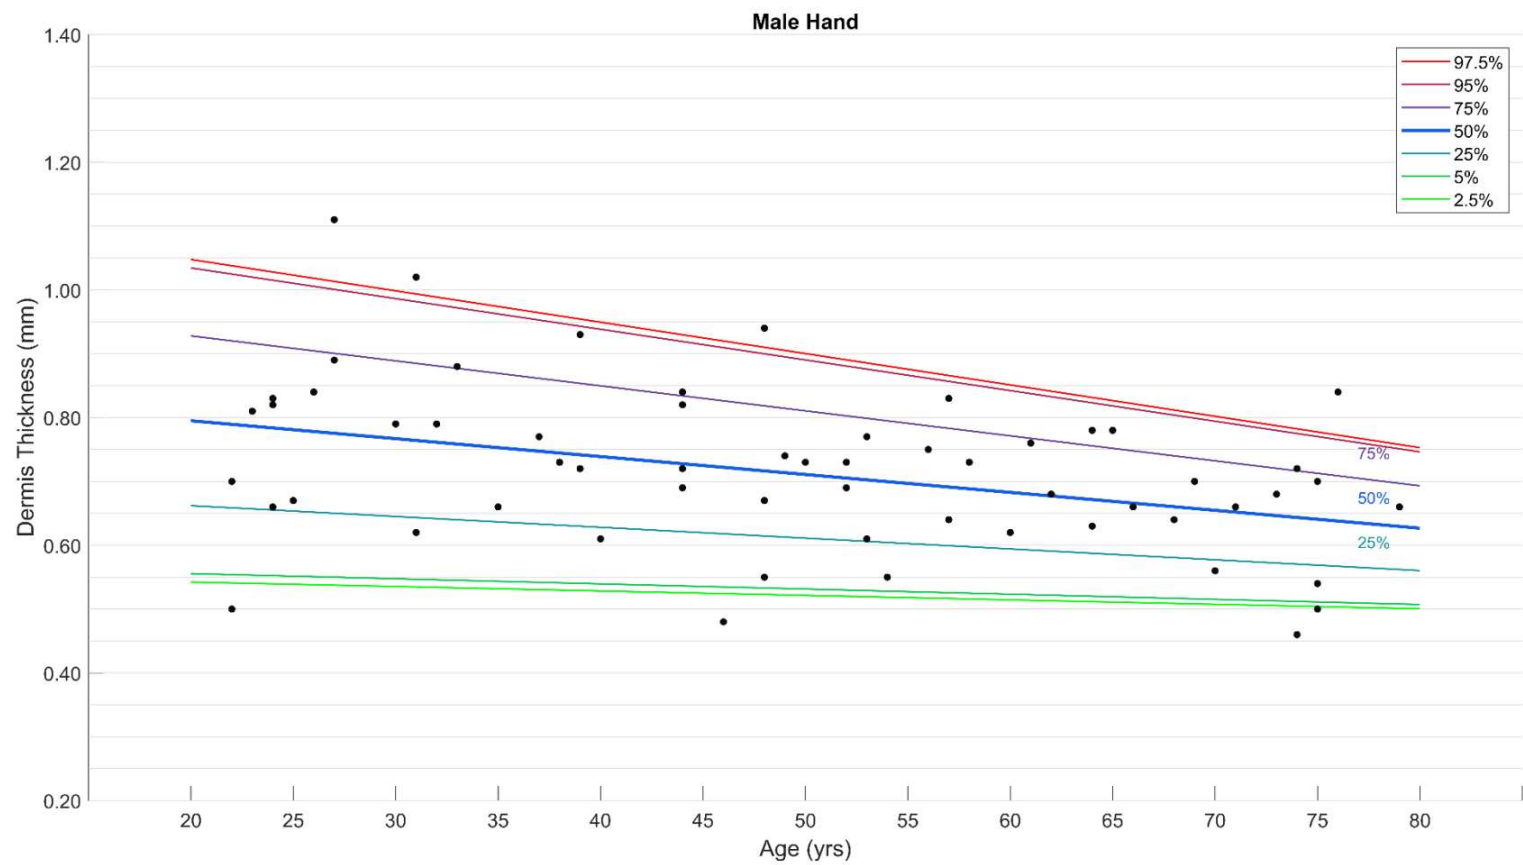

| Percentiles        | General equation for the estimate of the value for thickness (at age X) | R <sup>2</sup> |
|--------------------|-------------------------------------------------------------------------|----------------|
| 2,5 <sup>th</sup>  | 0.56 - 0.01 (X)                                                         | 0,04           |
| 5 <sup>th</sup>    | 0.57 - 0.01 (X)                                                         | 0,06           |
| 25 <sup>th</sup>   | 0.70 - 0.01 (X)                                                         | 0,36           |
| 50 <sup>th</sup>   | 0.85 - 0.01 (X)                                                         | 0,84           |
| 75 <sup>th</sup>   | 1.01 - 0.01 (X)                                                         | 0,95           |
| 95 <sup>th</sup>   | 1.13 - 0.01 (X)                                                         | 0,91           |
| 97.5 <sup>th</sup> | 1.15 - 0.01 (X)                                                         | 0,90           |

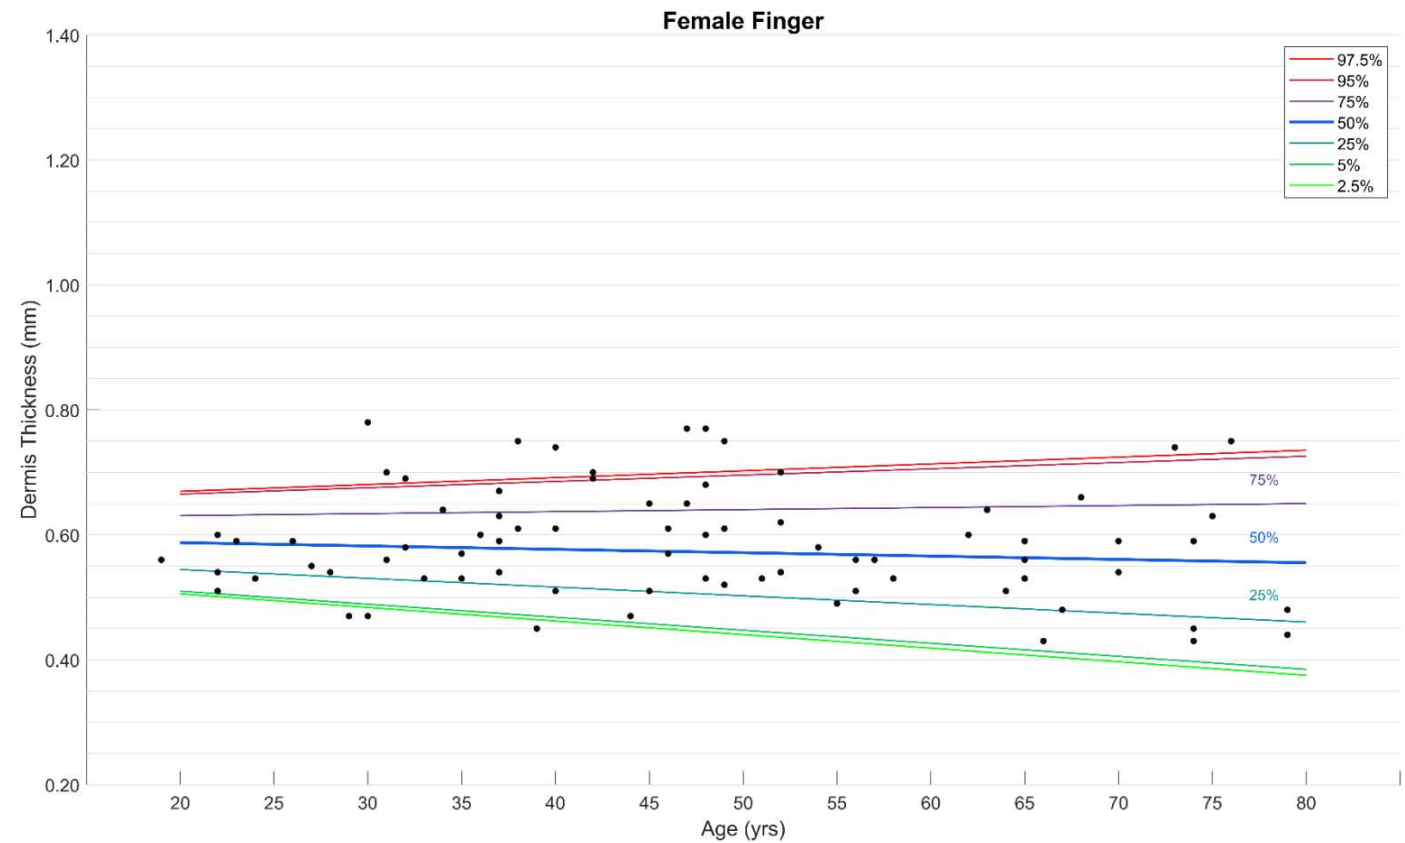

| Percentiles        | General equation for the estimate of the value for thickness (at age X) | R <sup>2</sup> |
|--------------------|-------------------------------------------------------------------------|----------------|
| 2,5 <sup>th</sup>  | 0.55 - 0.01 (X)                                                         | 0,65           |
| 5 <sup>th</sup>    | 0.55 - 0.01 (X)                                                         | 0,65           |
| 25 <sup>th</sup>   | 0.57 - 0.01 (X)                                                         | 0,55           |
| 50 <sup>th</sup>   | 0.60 - 0.01 (X)                                                         | 0,10           |
| 75 <sup>th</sup>   | 0.62 - 0.01 (X)                                                         | 0,02           |
| 95 <sup>th</sup>   | 0.65 - 0.01 (X)                                                         | 0,09           |
| 97.5 <sup>th</sup> | 0.65 - 0.01 (X)                                                         | 0,10           |

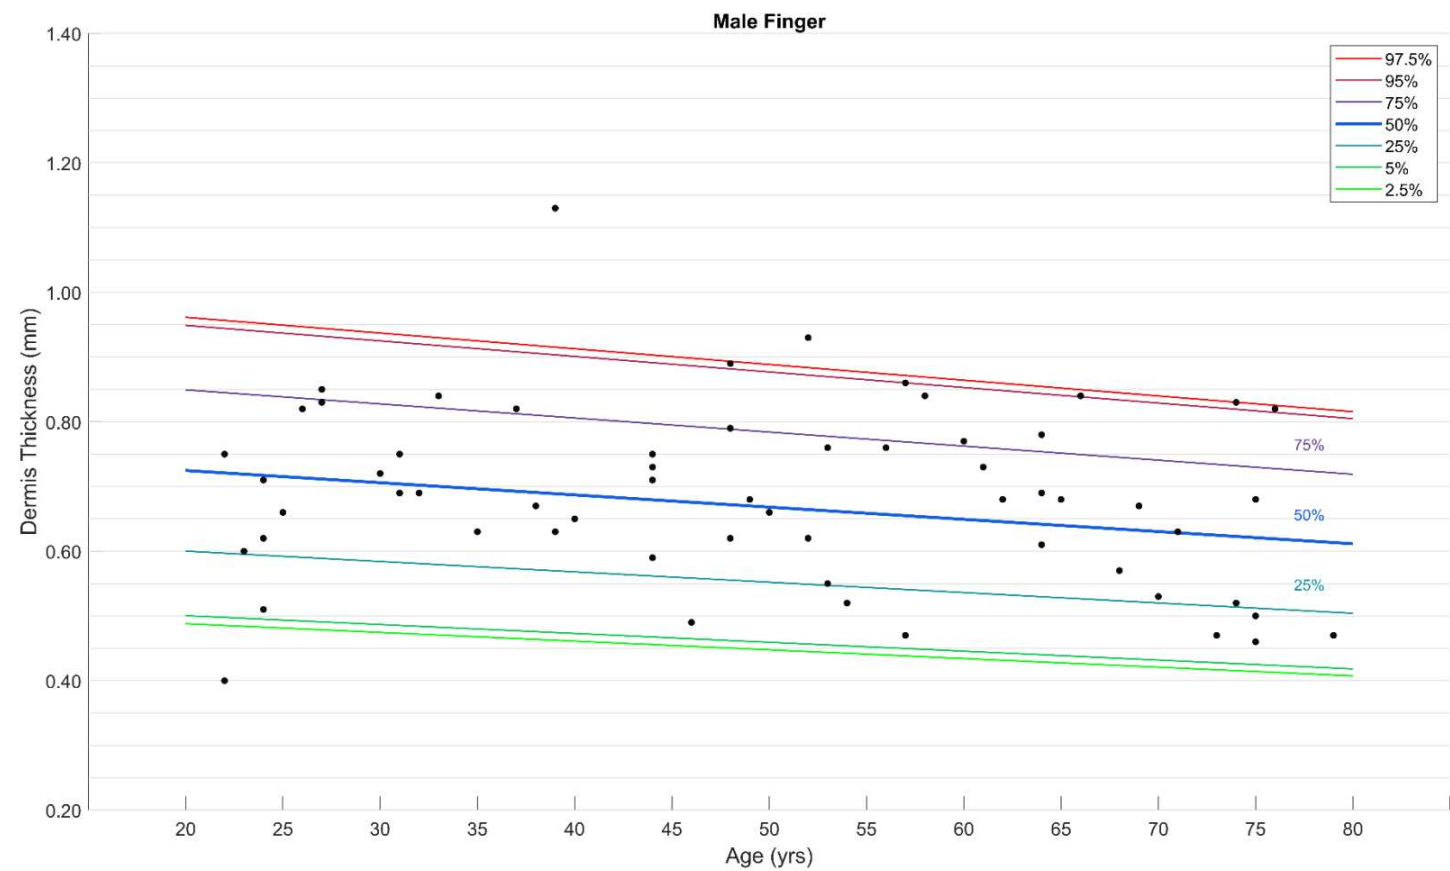

| Percentiles        | General equation for the estimate of the value for thickness (at age X) | R <sup>2</sup> |
|--------------------|-------------------------------------------------------------------------|----------------|
| 2,5 <sup>th</sup>  | 0.51 - 0.01 (X)                                                         | 0,08           |
| 5 <sup>th</sup>    | 0.53 - 0.01 (X)                                                         | 0,08           |
| 25 <sup>th</sup>   | 0.63 - 0.01 (X)                                                         | 0,17           |
| 50 <sup>th</sup>   | 0.76 - 0.01 (X)                                                         | 0,35           |
| 75 <sup>th</sup>   | 0.89 - 0.01 (X)                                                         | 0,48           |
| 95 <sup>th</sup>   | 1.00 - 0.01 (X)                                                         | 0,44           |
| 97.5 <sup>th</sup> | 1.01 - 0.01 (X)                                                         | 0,43           |

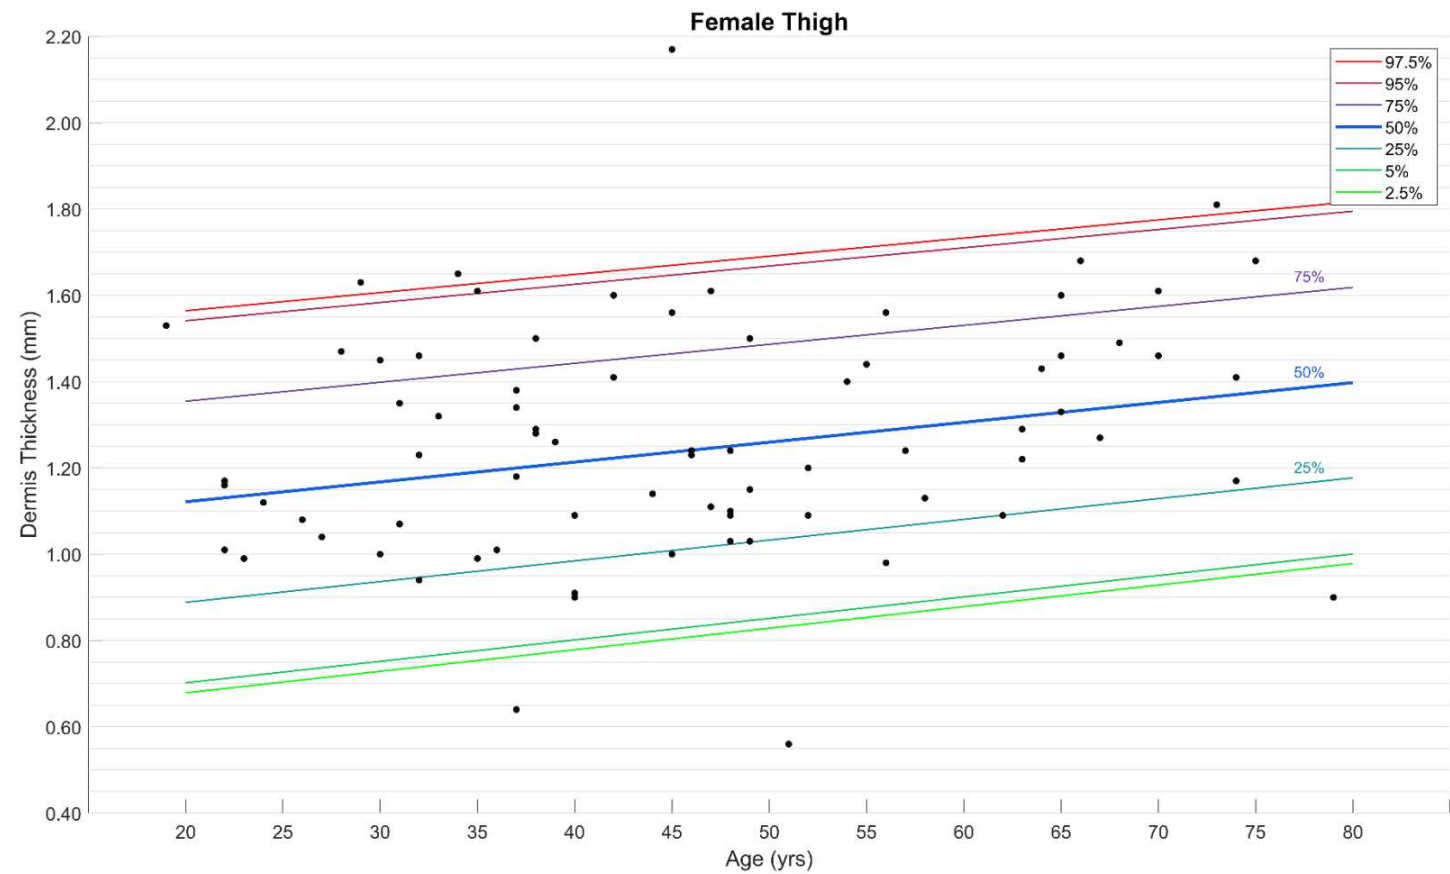

| Percentiles        | General equation for the estimate of the value for thickness (at age X) | R <sup>2</sup> |
|--------------------|-------------------------------------------------------------------------|----------------|
| 2,5 <sup>th</sup>  | 0.58 - 0.01 (X)                                                         | 0,36           |
| 5 <sup>th</sup>    | 0.60 - 0.01 (X)                                                         | 0,37           |
| 25 <sup>th</sup>   | 0.79 - 0.01 (X)                                                         | 0,49           |
| 50 <sup>th</sup>   | 1.03 - 0.01 (X)                                                         | 0,61           |
| 75 <sup>th</sup>   | 1.27 - 0.01 (X)                                                         | 0,55           |
| 95 <sup>th</sup>   | 1.46 - 0.01 (X)                                                         | 0,40           |
| 97.5 <sup>th</sup> | 1.48 - 0.01 (X)                                                         | 0,38           |



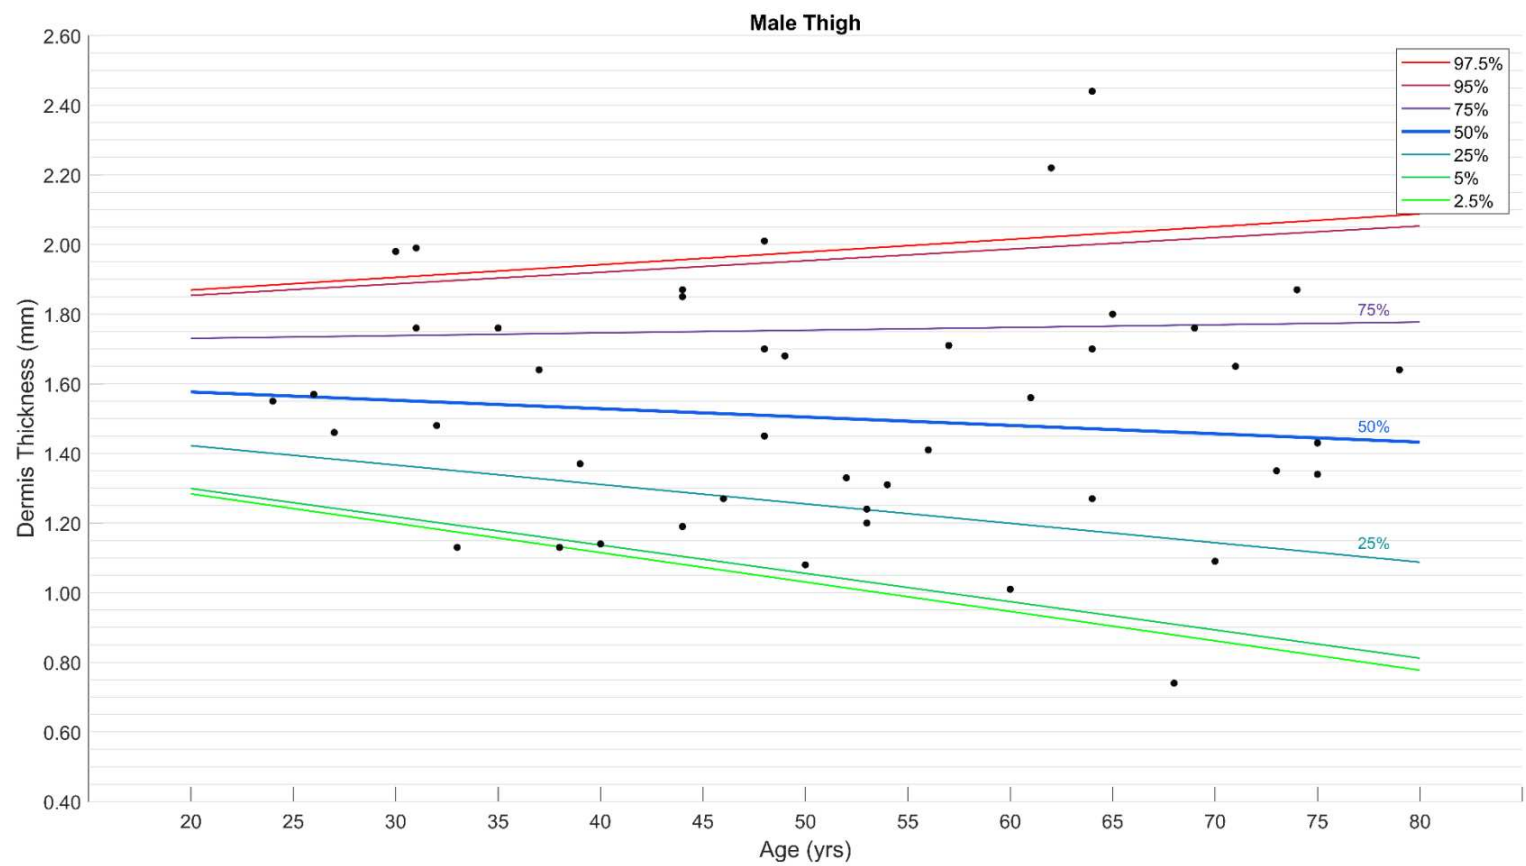

| Percentiles        | General equation for the estimate of the value for thickness (at age X) | R <sup>2</sup> |
|--------------------|-------------------------------------------------------------------------|----------------|
| 2,5 <sup>th</sup>  | 1.45 - 0.01 (X)                                                         | 0,48           |
| 5 <sup>th</sup>    | 1.46 - 0.01 (X)                                                         | 0,49           |
| 25 <sup>th</sup>   | 1.53 - 0.01 (X)                                                         | 0,59           |
| 50 <sup>th</sup>   | 1.62 - 0.01 (X)                                                         | 0,18           |
| 75 <sup>th</sup>   | 1.71 - 0.01 (X)                                                         | 0,01           |
| 95 <sup>th</sup>   | 1.79 - 0.01 (X)                                                         | 0,05           |
| 97.5 <sup>th</sup> | 1.80 - 0.01 (X)                                                         | 0,05           |

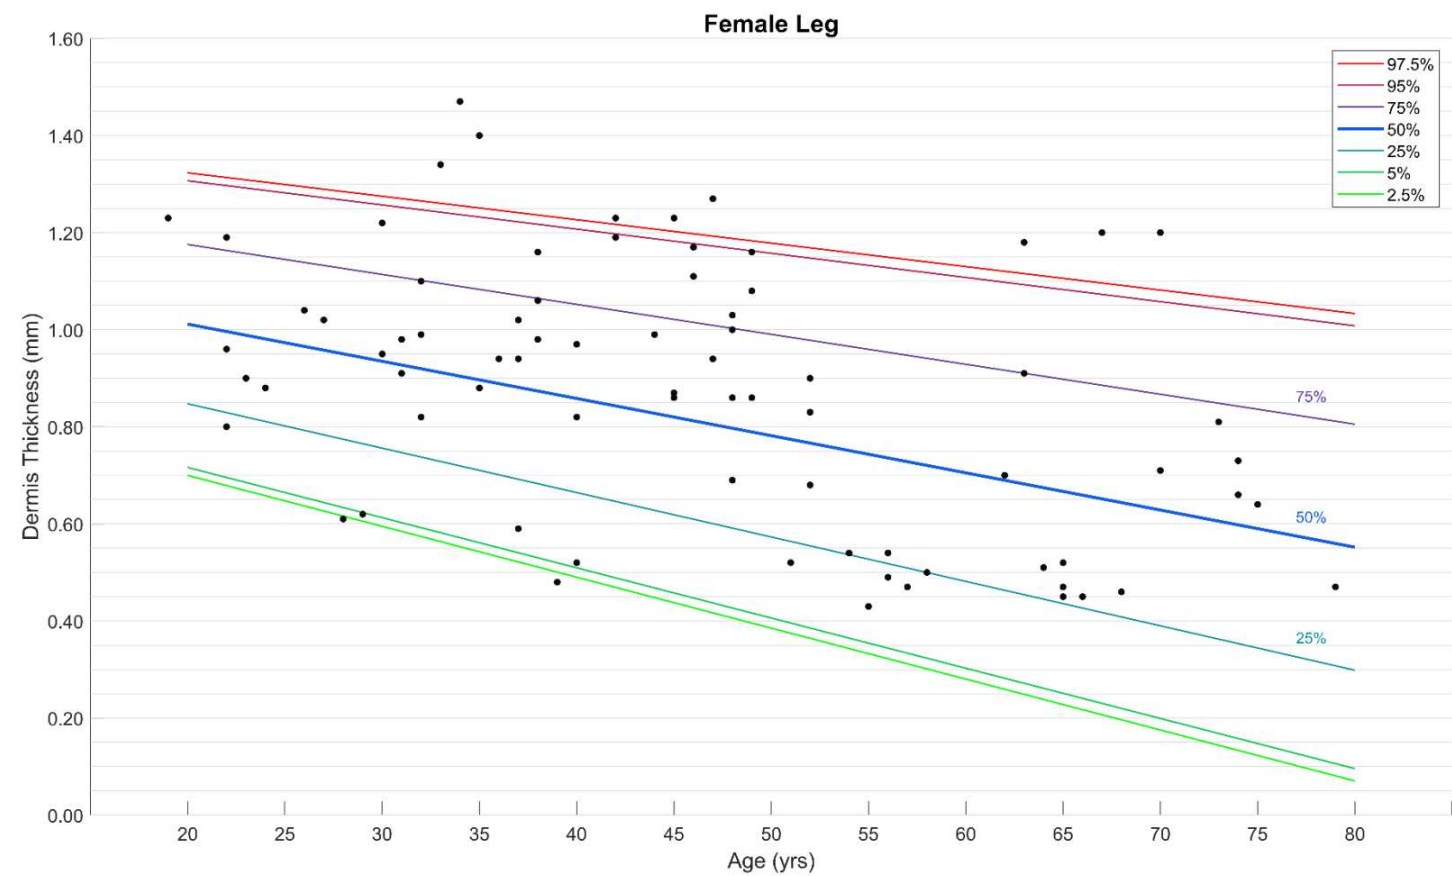

| Percentiles        | General equation for the estimate of the value for thickness (at age X) | R <sup>2</sup> |
|--------------------|-------------------------------------------------------------------------|----------------|
| 2,5 <sup>th</sup>  | 0.91 - 0.01 (X)                                                         | 0,46           |
| 5 <sup>th</sup>    | 0.92 - 0.01 (X)                                                         | 0,47           |
| 25 <sup>th</sup>   | 1.03 - 0.01 (X)                                                         | 0,50           |
| 50 <sup>th</sup>   | 1.16 - 0.01 (X)                                                         | 0,50           |
| 75 <sup>th</sup>   | 1.30 - 0.01 (X)                                                         | 0,39           |
| 95 <sup>th</sup>   | 1.41 + 0.01 (X)                                                         | 0,23           |
| 97.5 <sup>th</sup> | 1.42 + 0.01 (X)                                                         | 0,21           |

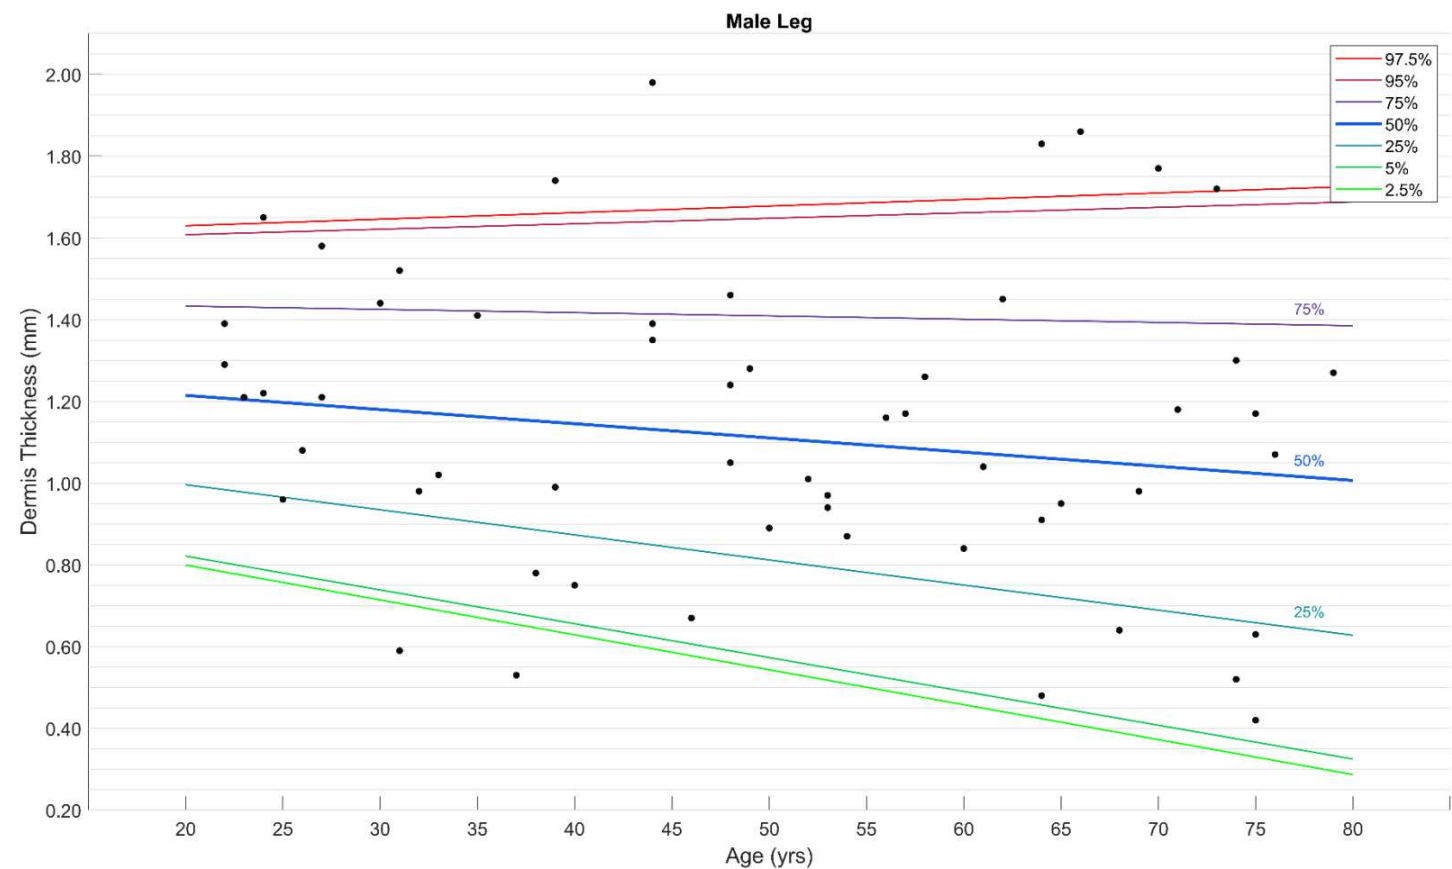

| Percentiles        | General equation for the estimate of the value for thickness (at age X) | R <sup>2</sup> |
|--------------------|-------------------------------------------------------------------------|----------------|
| 2,5 <sup>th</sup>  | 0.97 - 0.01 (X)                                                         | 0,40           |
| 5 <sup>th</sup>    | 0.99 - 0.01 (X)                                                         | 0,41           |
| 25 <sup>th</sup>   | 1.12 - 0.01 (X)                                                         | 0,48           |
| 50 <sup>th</sup>   | 1.28 - 0.01 (X)                                                         | 0,40           |
| 75 <sup>th</sup>   | 1.45 - 0.01 (X)                                                         | 0,01           |
| 95 <sup>th</sup>   | 1.58 + 0.01 (X)                                                         | 0,01           |
| 97.5 <sup>th</sup> | 1.60 + 0.01 (X)                                                         | 0,02           |

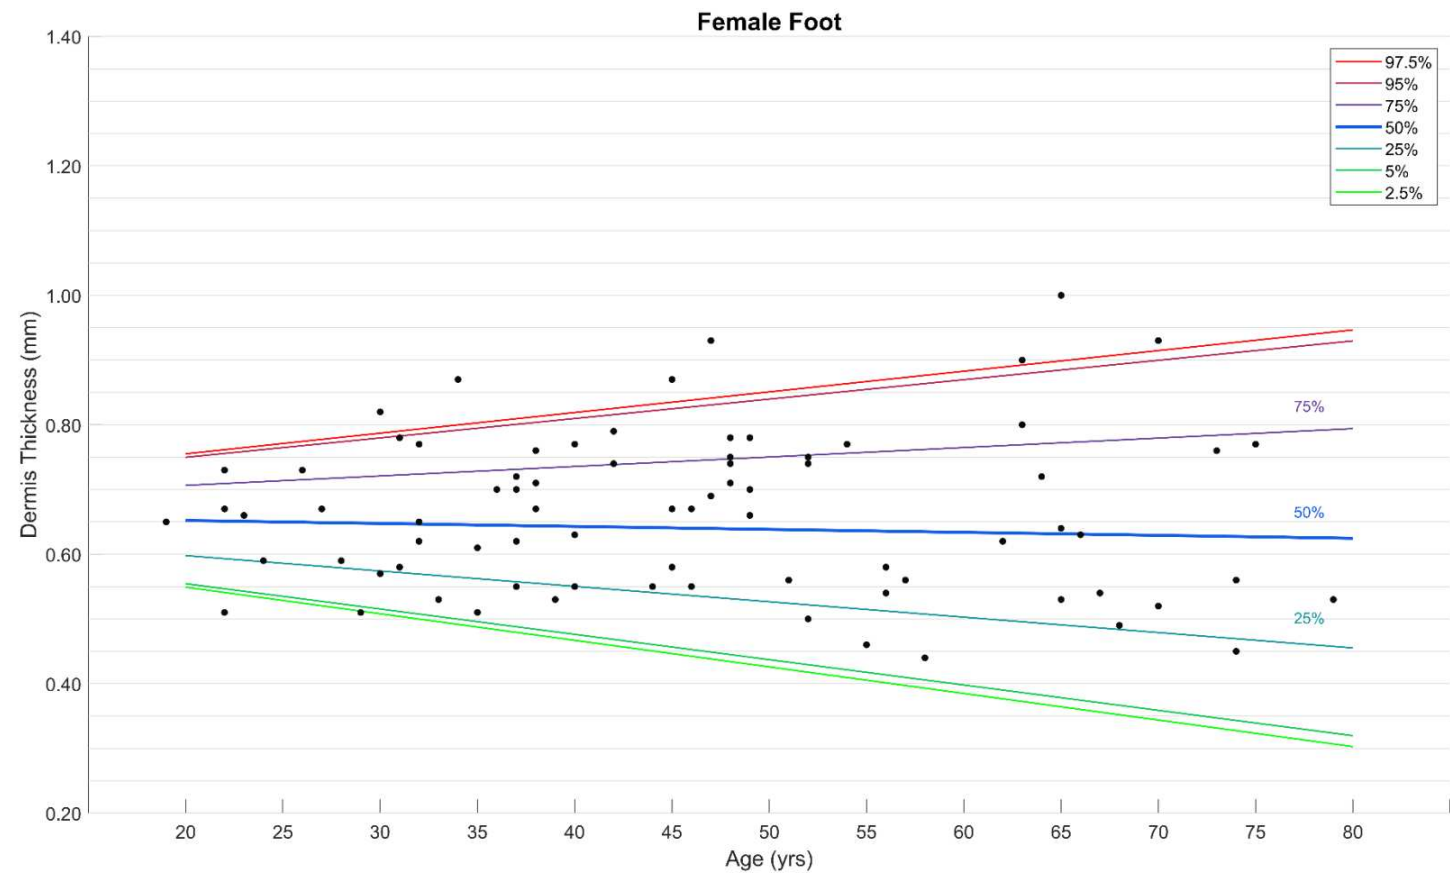

| Percentiles        | General equation for the estimate of the value for thickness (at age X) | R <sup>2</sup> |
|--------------------|-------------------------------------------------------------------------|----------------|
| 2,5 <sup>th</sup>  | 0.63 + 0.001 (X)                                                        | 0,79           |
| 5 <sup>th</sup>    | 0.63 + 0.001 (X)                                                        | 0,78           |
| 25 <sup>th</sup>   | 0.65 + 0.001 (X)                                                        | 0,57           |
| 50 <sup>th</sup>   | 0.66 + 0.001 (X)                                                        | 0,04           |
| 75 <sup>th</sup>   | 0.68 + 0.001 (X)                                                        | 0,25           |
| 95 <sup>th</sup>   | 0.69 + 0.001 (X)                                                        | 0,52           |
| 97.5 <sup>th</sup> | 0.69 + 0.001 (X)                                                        | 0,55           |

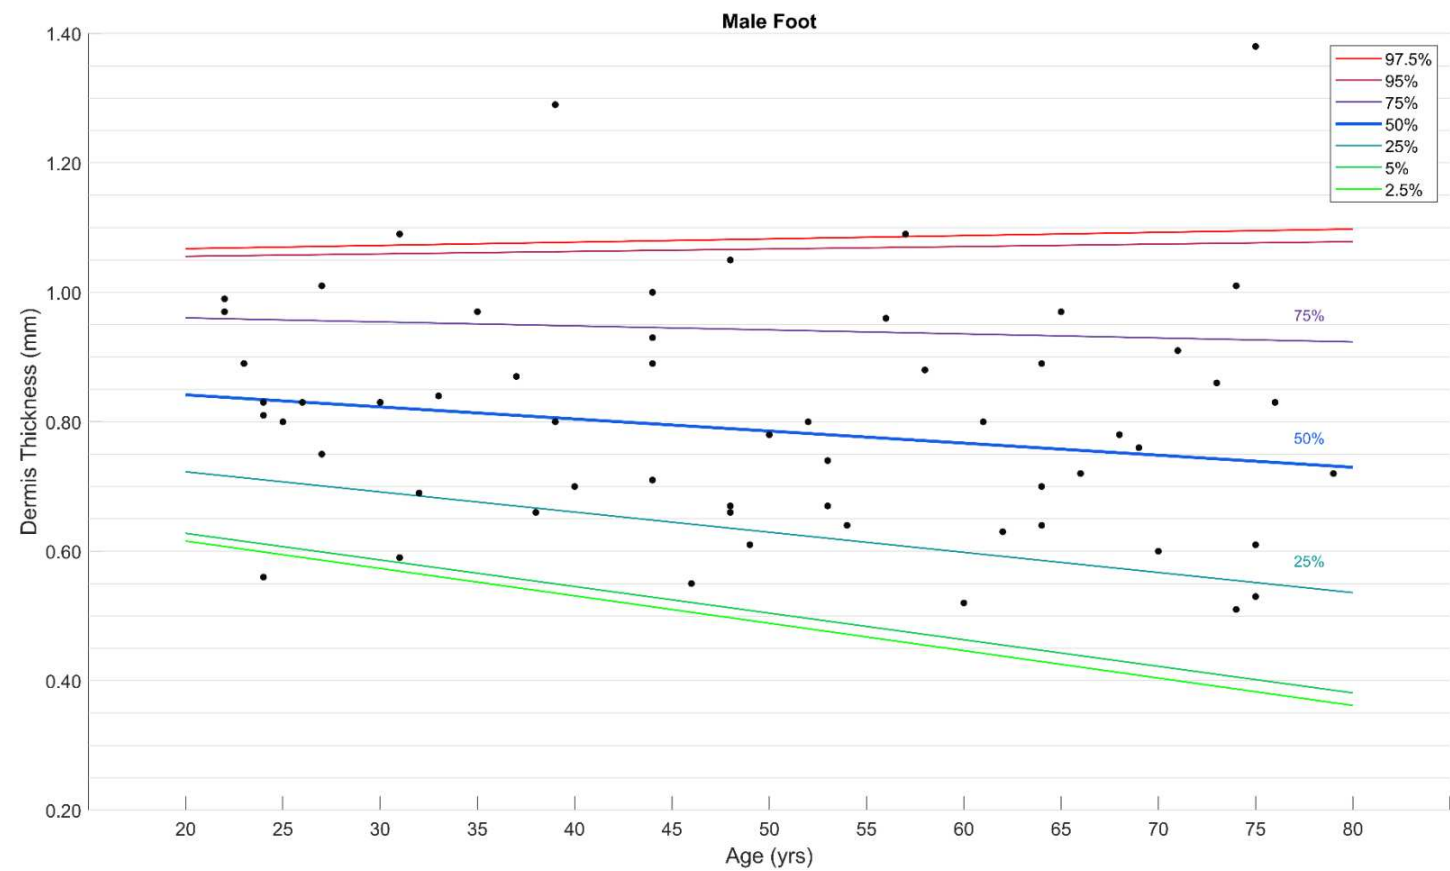

| Percentiles        | General equation for the estimate of the value for thickness (at age X) | R <sup>2</sup> |
|--------------------|-------------------------------------------------------------------------|----------------|
| 2,5 <sup>th</sup>  | 0.70 + 0.001 (X)                                                        | 0,51           |
| 5 <sup>th</sup>    | 0.71 (X) + 0.001 (X)                                                    | 0,53           |
| 25 <sup>th</sup>   | 0.78 (X) + 0.001 (X)                                                    | 0,67           |
| 50 <sup>th</sup>   | 0.88 (X) + 0.001 (X)                                                    | 0,58           |
| 75 <sup>th</sup>   | 0.97 (X) + 0.001 (X)                                                    | 0,03           |
| 95 <sup>th</sup>   | 1.05 (X) + 0.001 (X)                                                    | 0,00           |
| 97.5 <sup>th</sup> | 1.06 (X) + 0.001 (X)                                                    | 0,01           |

**b) Percentile normality curves for skin stiffness in females and males.**

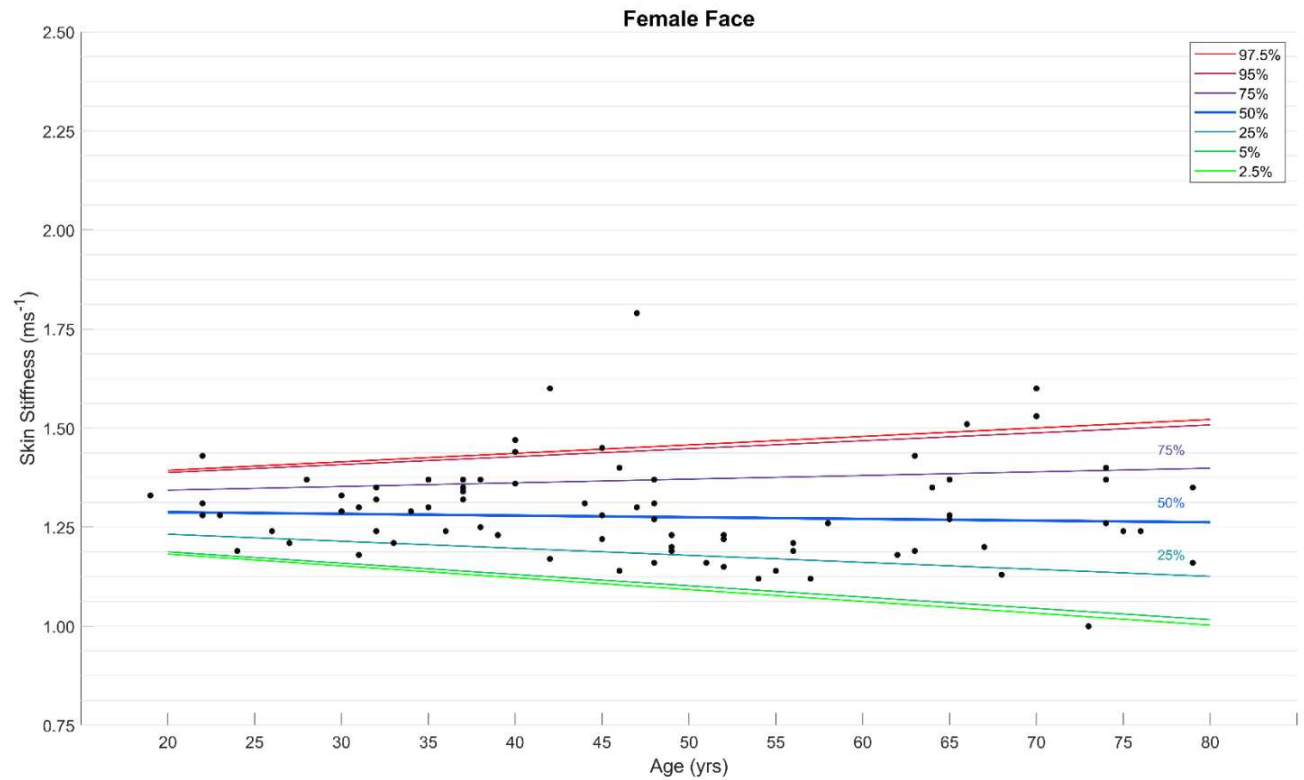

| Percentiles        | General equation for the estimate of the value for stiffness (at age X) | R²   |
|--------------------|-------------------------------------------------------------------------|------|
| 2,5 <sup>th</sup>  | 1.24 - 0.003 (X)                                                        | 0,55 |
| 5 <sup>th</sup>    | 1.24 - 0.003 (X)                                                        | 0,56 |
| 25 <sup>th</sup>   | 1.27 - 0.002 (X)                                                        | 0,55 |
| 50 <sup>th</sup>   | 1.30 - 0.0001 (X)                                                       | 0,02 |
| 75 <sup>th</sup>   | 1.33 + 0.001 (X)                                                        | 0,04 |
| 95 <sup>th</sup>   | 1.35 + 0.002 (X)                                                        | 0,09 |
| 97.5 <sup>th</sup> | 1.35 + 0.002 (X)                                                        | 0,55 |

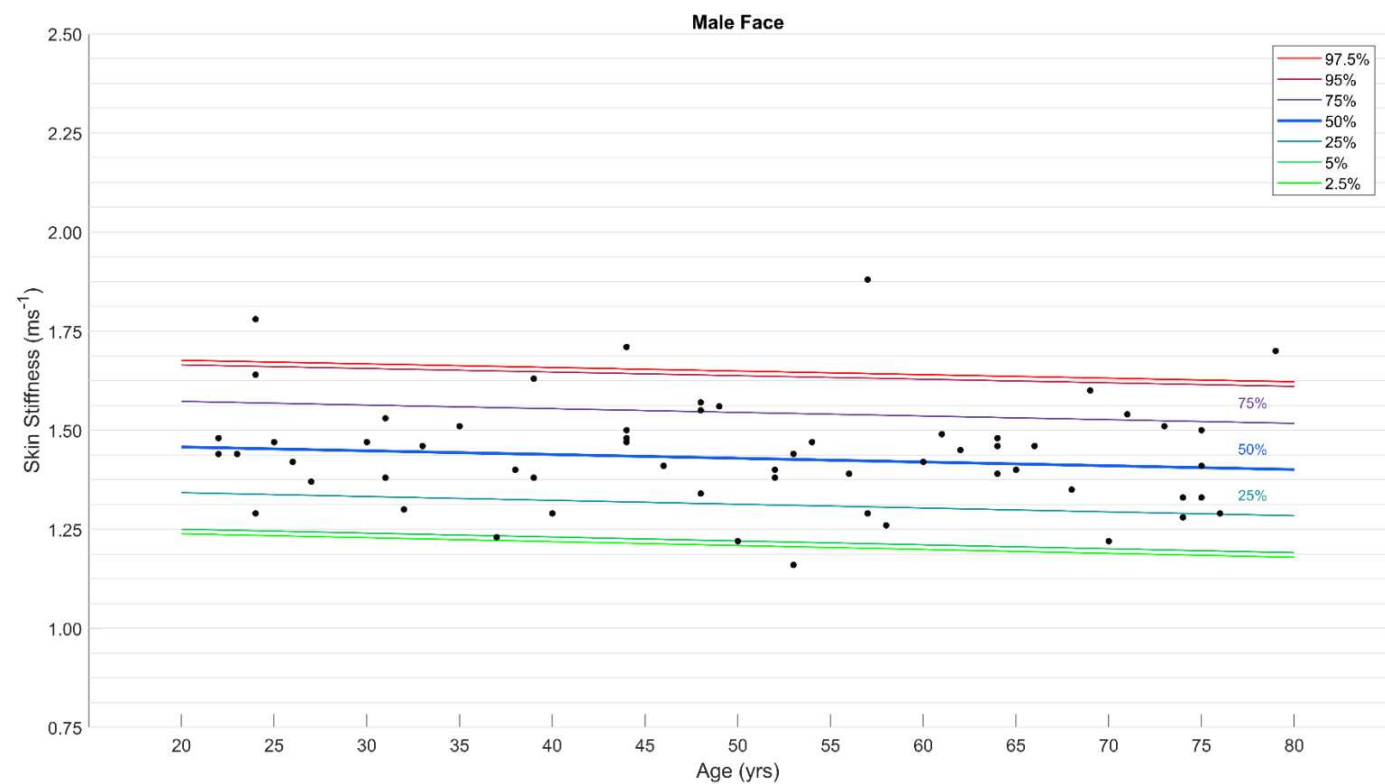

| Percentiles        | General equation for the estimate of the value for stiffness (at age X) | R²   |
|--------------------|-------------------------------------------------------------------------|------|
| 2,5 <sup>th</sup>  | 1.26 - 0.001 (X)                                                        | 0,03 |
| 5 <sup>th</sup>    | 1.27 - 0.001 (X)                                                        | 0,04 |
| 25 <sup>th</sup>   | 1.36 - 0.001 (X)                                                        | 0,07 |
| 50 <sup>th</sup>   | 1.48 - 0.001 (X)                                                        | 0,21 |
| 75 <sup>th</sup>   | 1.59 - 0.001 (X)                                                        | 0,27 |
| 95 <sup>th</sup>   | 1.68 - 0.001 (X)                                                        | 0,10 |
| 97.5 <sup>th</sup> | 1.69 - 0.001 (X)                                                        | 0,09 |



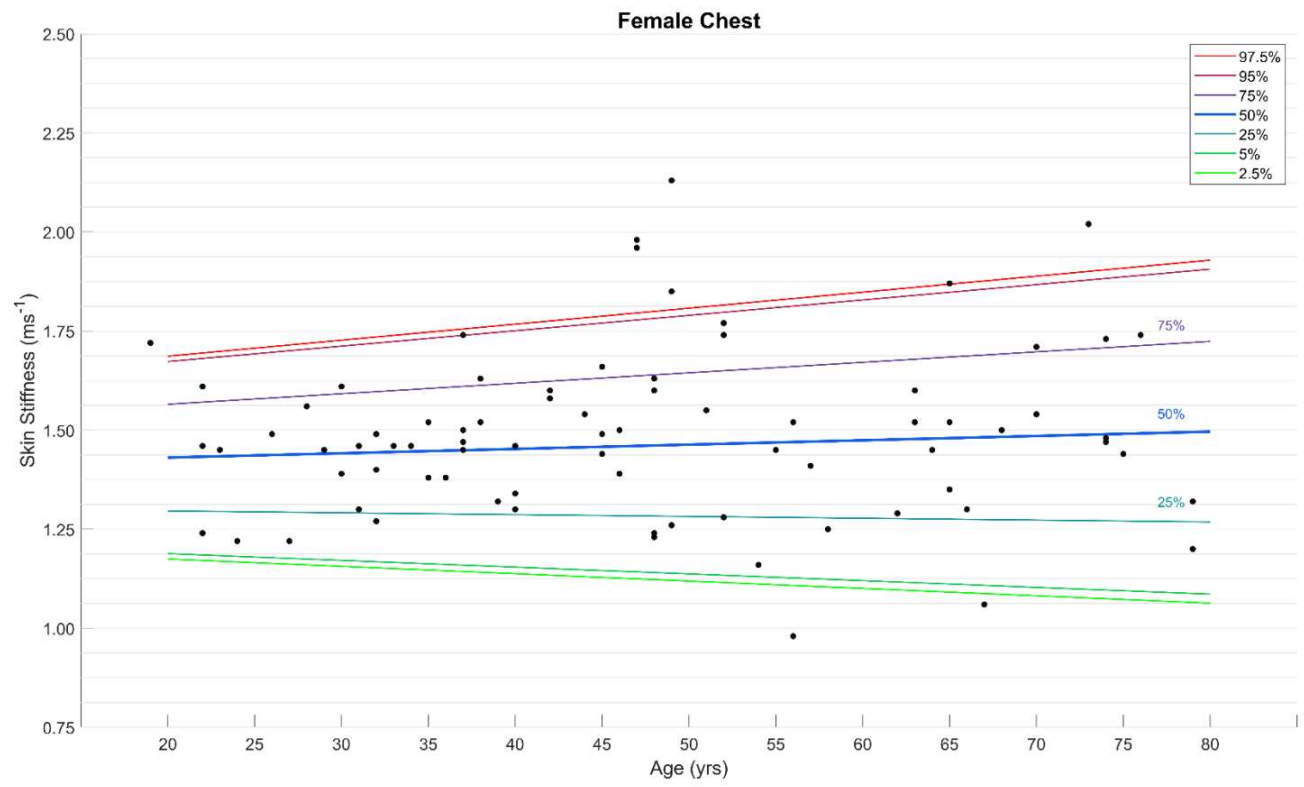

| Percentiles        | General equation for the estimate of the value for stiffness (at age X) | R <sup>2</sup> |
|--------------------|-------------------------------------------------------------------------|----------------|
| 2,5 <sup>th</sup>  | 1.21 - 0.002 (X)                                                        | 0,14           |
| 5 <sup>th</sup>    | 1.22 - 0.002 (X)                                                        | 0,13           |
| 25 <sup>th</sup>   | 1.31 + 0.001 (X)                                                        | 0,02           |
| 50 <sup>th</sup>   | 1.41 + 0.001 (X)                                                        | 0,11           |
| 75 <sup>th</sup>   | 1.51 + 0.001 (X)                                                        | 0,30           |
| 95 <sup>th</sup>   | 1.60 + 0.004 (X)                                                        | 0,35           |
| 97.5 <sup>th</sup> | 1.61 + 0.004 (X)                                                        | 0,35           |

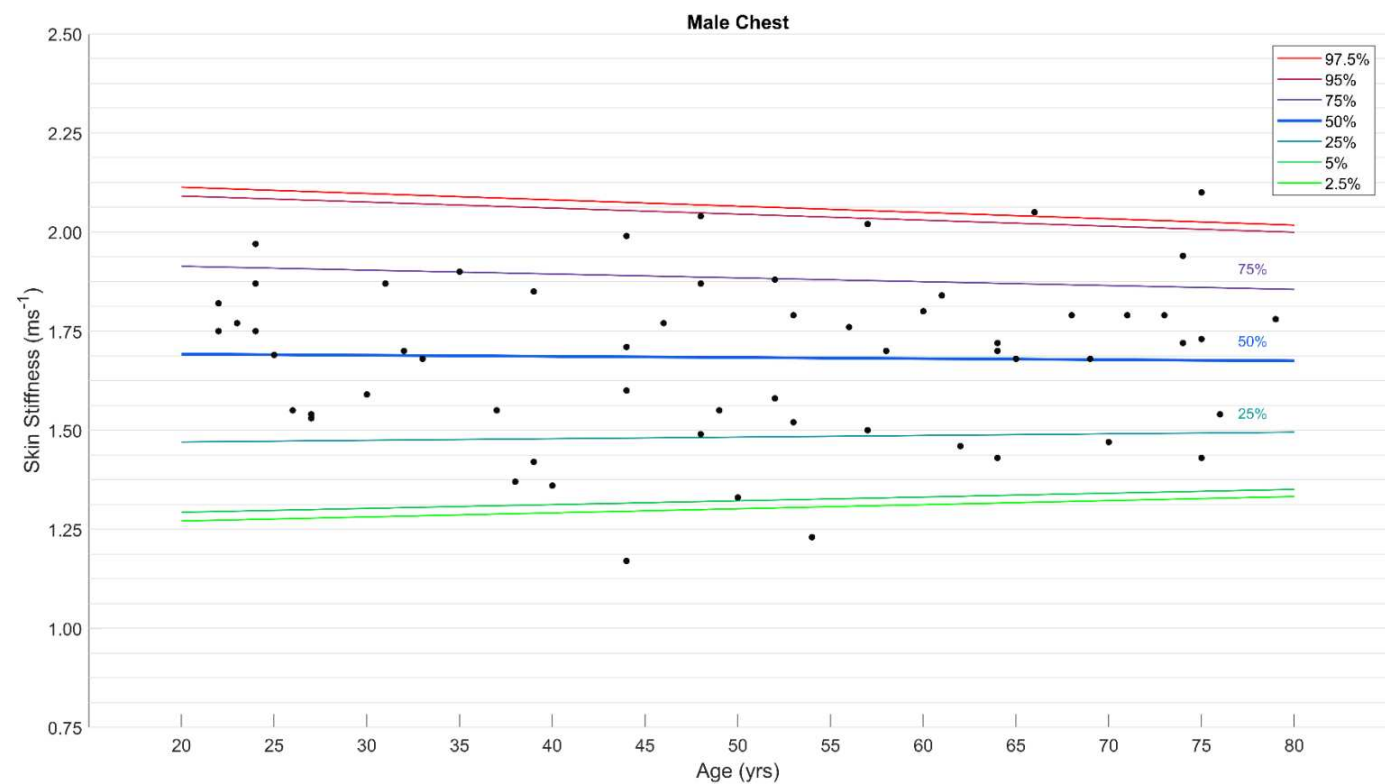

| Percentiles        | General equation for the estimate of the value for stiffness (at age X) | R <sup>2</sup> |
|--------------------|-------------------------------------------------------------------------|----------------|
| 2,5 <sup>th</sup>  | 1.25 - 0,001 (X)                                                        | 0,02           |
| 5 <sup>th</sup>    | 1.27 + 0,001 (X)                                                        | 0,02           |
| 25 <sup>th</sup>   | 1.46 + 0,001 (X)                                                        | 0,01           |
| 50 <sup>th</sup>   | 1.70 + 0,001 (X)                                                        | 0,01           |
| 75 <sup>th</sup>   | 1.93 - 0,001 (X)                                                        | 0,05           |
| 95 <sup>th</sup>   | 2.12 - 0,002 (X)                                                        | 0,05           |
| 97.5 <sup>th</sup> | 2.14 - 0,002 (X)                                                        | 0,05           |

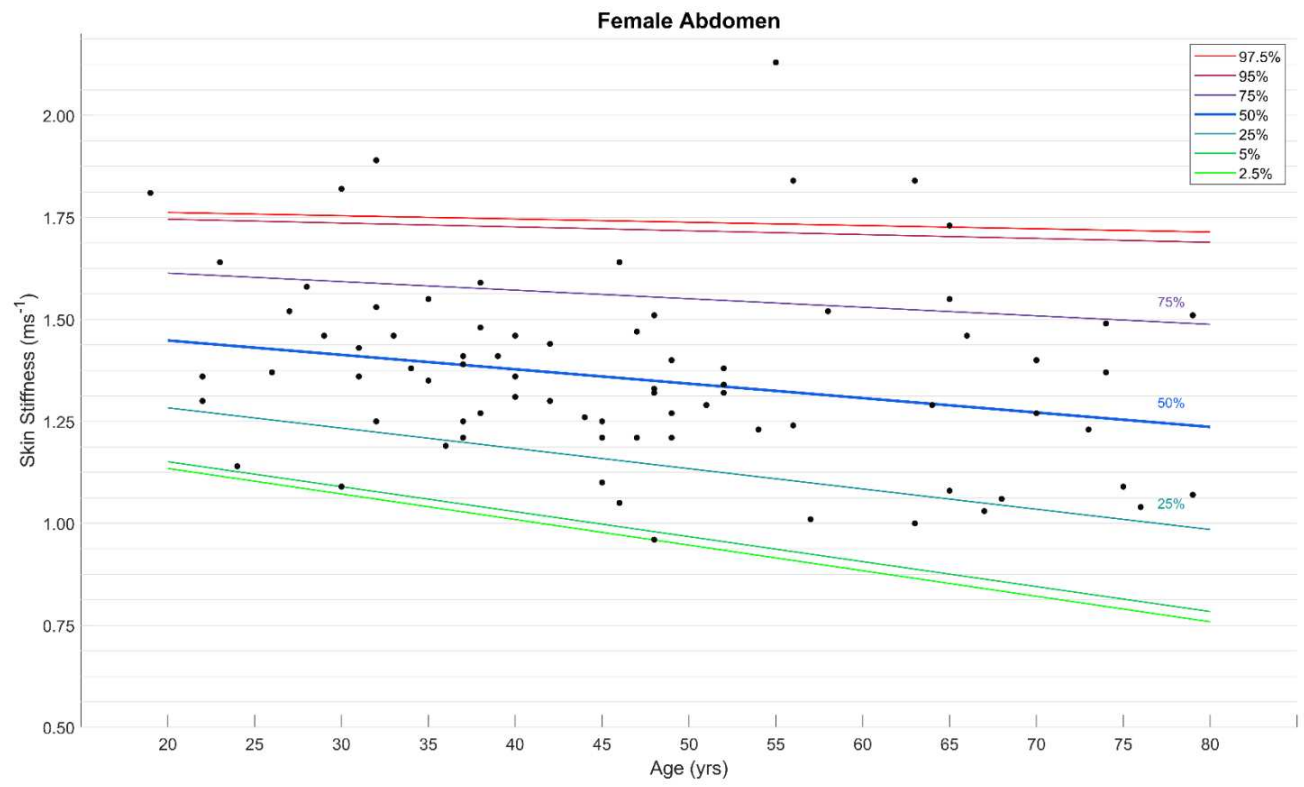

| Percentiles        | General equation for the estimate of the value for stiffness (at age X) | R²   |
|--------------------|-------------------------------------------------------------------------|------|
| 2,5 <sup>th</sup>  | -0,006 + 1.26 (X)                                                       | 0,52 |
| 5 <sup>th</sup>    | -0,006 + 1.27 (X)                                                       | 0,54 |
| 25 <sup>th</sup>   | -0,005 + 1.38 (X)                                                       | 0,71 |
| 50 <sup>th</sup>   | -0,004 + 1.52 (X)                                                       | 0,71 |
| 75 <sup>th</sup>   | -0,002 + 1.66 (X)                                                       | 0,15 |
| 95 <sup>th</sup>   | -0,001 + 1.76 (X)                                                       | 0,01 |
| 97.5 <sup>th</sup> | -0.001 + 1.78 (X)                                                       | 0,01 |

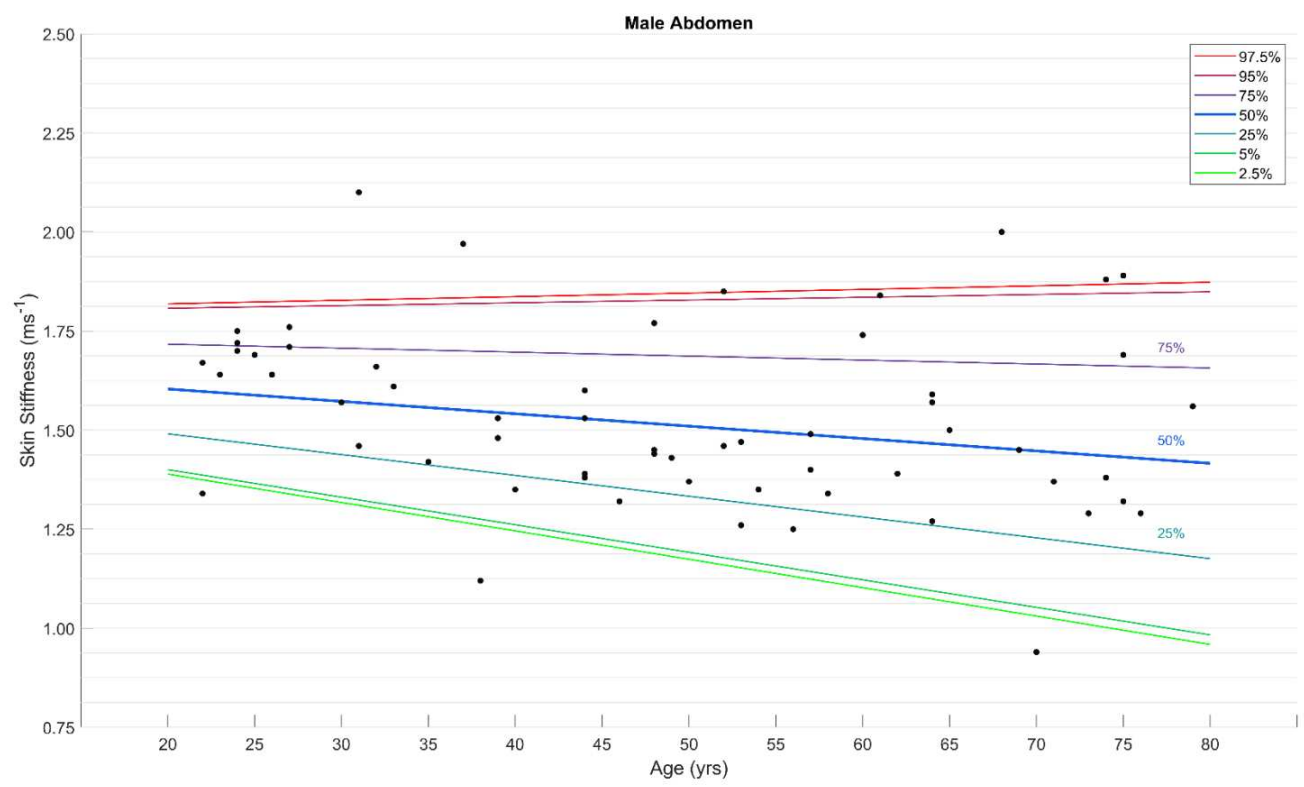

| Percentiles        | General equation for the estimate of the value for stiffness (at age X) | R <sup>2</sup> |
|--------------------|-------------------------------------------------------------------------|----------------|
| 2,5 <sup>th</sup>  | -0,007 + 1.53 (X)                                                       | 0,57           |
| 5 <sup>th</sup>    | -0,007 + 1.54 (X)                                                       | 0,57           |
| 25 <sup>th</sup>   | -0,005 + 1.60 (X)                                                       | 0,58           |
| 50 <sup>th</sup>   | -0,003 + 1.67 (X)                                                       | 0,39           |
| 75 <sup>th</sup>   | -0,001 + 1.74 (X)                                                       | 0,03           |
| 95 <sup>th</sup>   | 0,001 + 1.79 (X)                                                        | 0,01           |
| 97.5 <sup>th</sup> | 0.001 + 1.80 (X)                                                        | 0,02           |

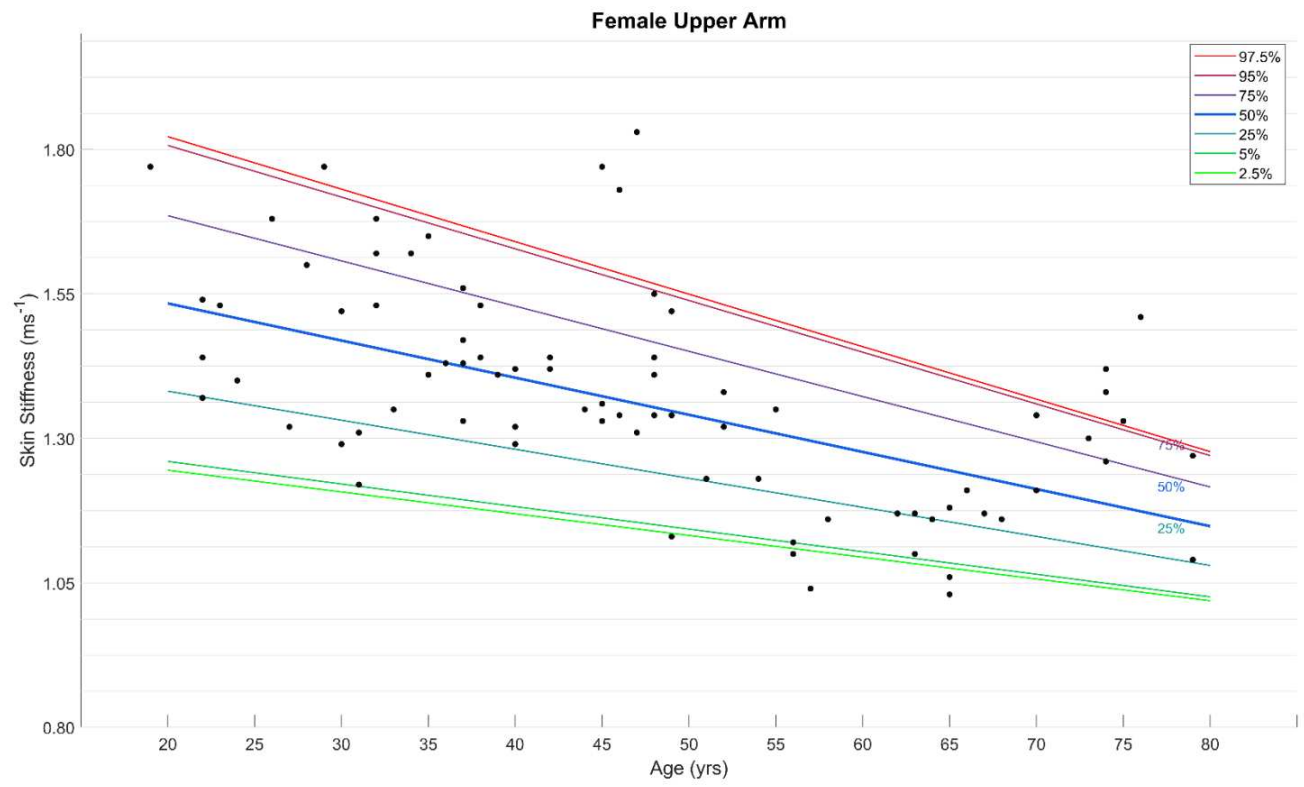

| Percentiles        | General equation for the estimate of the value for stiffness (at age X) | R <sup>2</sup> |
|--------------------|-------------------------------------------------------------------------|----------------|
| 2,5 <sup>th</sup>  | -0,004 + 1.32 (X)                                                       | 0,56           |
| 5 <sup>th</sup>    | -0,004 + 1.34 (X)                                                       | 0,58           |
| 25 <sup>th</sup>   | -0,005 + 1.48 (X)                                                       | 0,65           |
| 50 <sup>th</sup>   | -0,006 + 1.66 (X)                                                       | 0,67           |
| 75 <sup>th</sup>   | -0,008 + 1.84 (X)                                                       | 0,65           |
| 95 <sup>th</sup>   | -0,009 + 1.99 (X)                                                       | 0,63           |
| 97.5 <sup>th</sup> | -0.009 + 2.00 (X)                                                       | 0,63           |

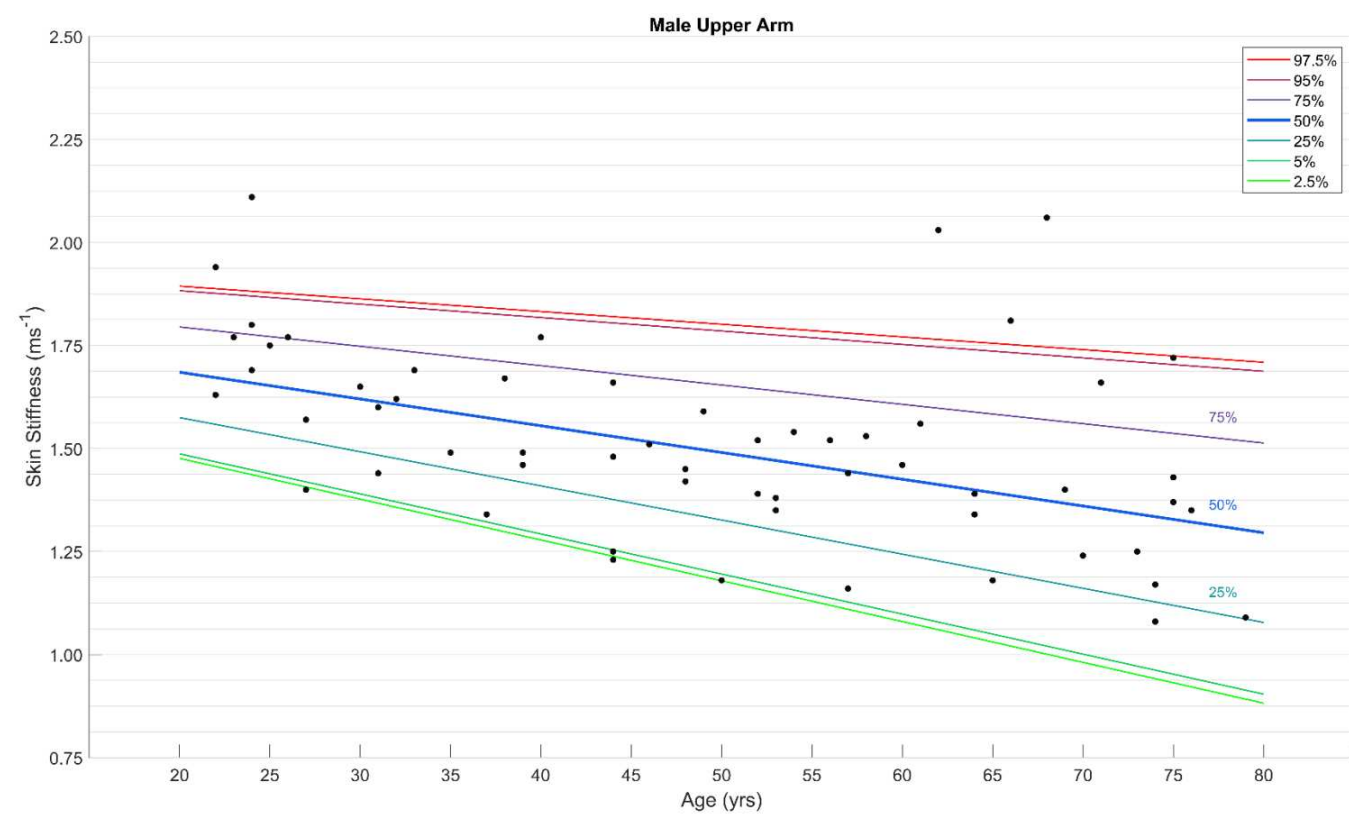

| Percentiles        | General equation for the estimate of the value for stiffness (at age X) | R <sup>2</sup> |
|--------------------|-------------------------------------------------------------------------|----------------|
| 2,5 <sup>th</sup>  | -0,01 + 0.81 (X)                                                        | 0,65           |
| 5 <sup>th</sup>    | -0,01 + 0.82 (X)                                                        | 0,64           |
| 25 <sup>th</sup>   | -0,008 + 0.88 (X)                                                       | 0,62           |
| 50 <sup>th</sup>   | -0,006 + 0.96 (X)                                                       | 0,52           |
| 75 <sup>th</sup>   | -0,005 + 1.04 (X)                                                       | 0,29           |
| 95 <sup>th</sup>   | -0,003 + 1.10 (X)                                                       | 0,06           |
| 97.5 <sup>th</sup> | -0.003 + 1.10 (X)                                                       | 0,04           |

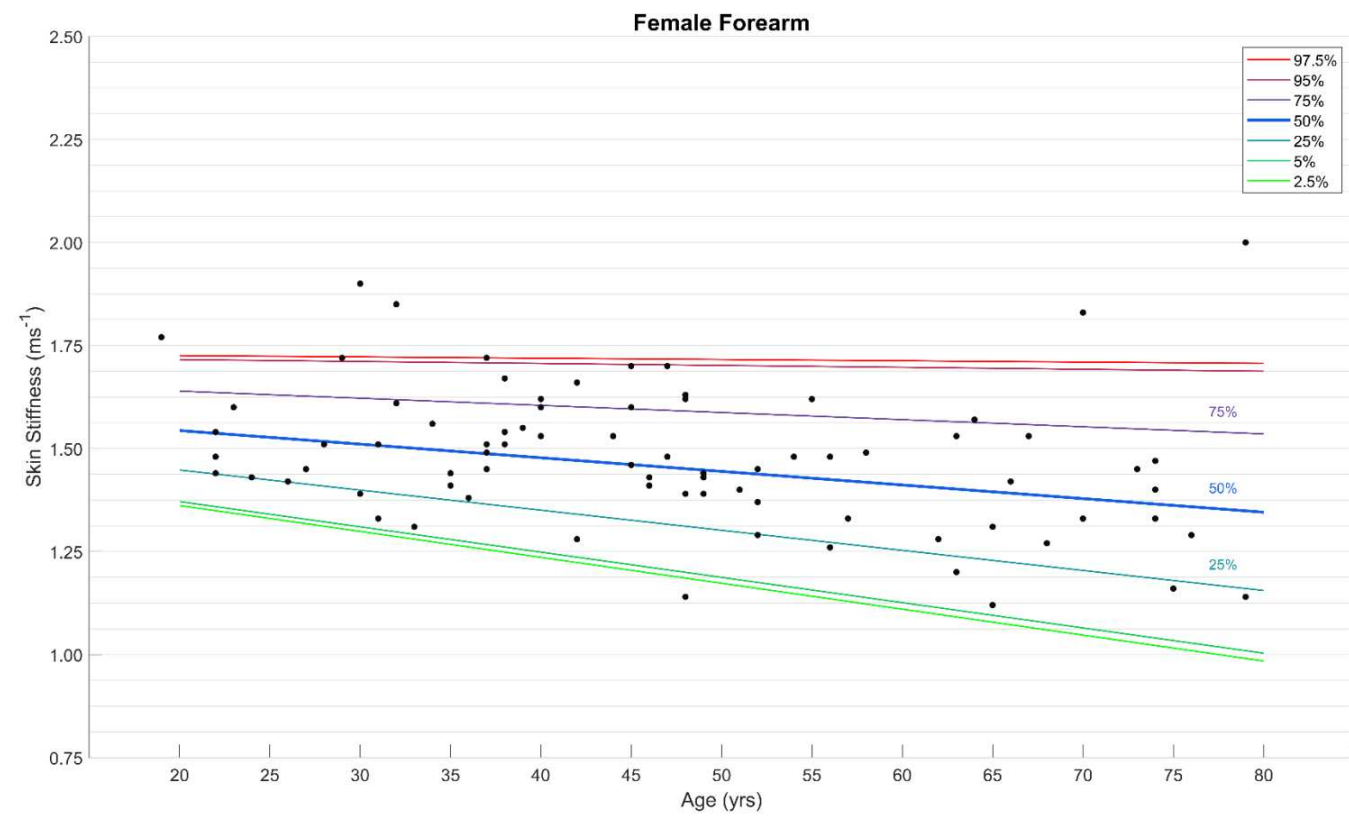

| Percentiles        | General equation for the estimate of the value for stiffness (at age X) | R²   |
|--------------------|-------------------------------------------------------------------------|------|
| 2,5 <sup>th</sup>  | -0,006 + 1.49 (X)                                                       | 0,80 |
| 5 <sup>th</sup>    | -0,006 + 1.49 (X)                                                       | 0,81 |
| 25 <sup>th</sup>   | -0,005 + 1.55 (X)                                                       | 0,90 |
| 50 <sup>th</sup>   | -0,003 + 1.61 (X)                                                       | 0,74 |
| 75 <sup>th</sup>   | -0,002 + 1.67 (X)                                                       | 0,16 |
| 95 <sup>th</sup>   | 0,000 + 1.73 (X)                                                        | 0,01 |
| 97.5 <sup>th</sup> | 0.000 + 1.73 (X)                                                        | 0,00 |

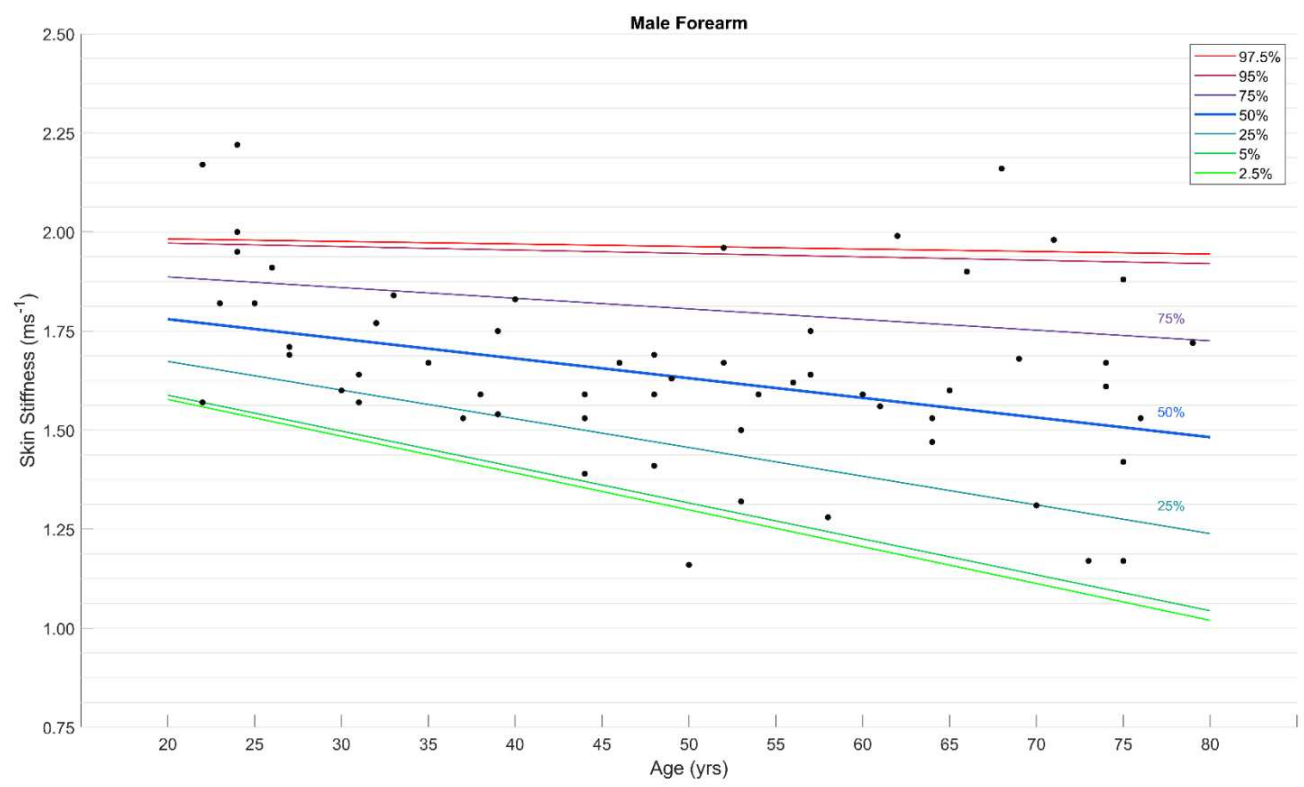

| Percentiles        | General equation for the estimate of the value for stiffness (at age X) | R <sup>2</sup> |
|--------------------|-------------------------------------------------------------------------|----------------|
| 2,5 <sup>th</sup>  | -0,01 + 1.76 (X)                                                        | 0,90           |
| 5 <sup>th</sup>    | -0,01 + 1.77 (X)                                                        | 0,90           |
| 25 <sup>th</sup>   | -0,008 + 1.82 (X)                                                       | 0,83           |
| 50 <sup>th</sup>   | -0,006 + 1.88 (X)                                                       | 0,54           |
| 75 <sup>th</sup>   | -0,005 + 1.94 (X)                                                       | 0,15           |
| 95 <sup>th</sup>   | -0,003 + 1.99 (X)                                                       | 0,01           |
| 97.5 <sup>th</sup> | -0.003 + 2.00 (X)                                                       | 0,01           |



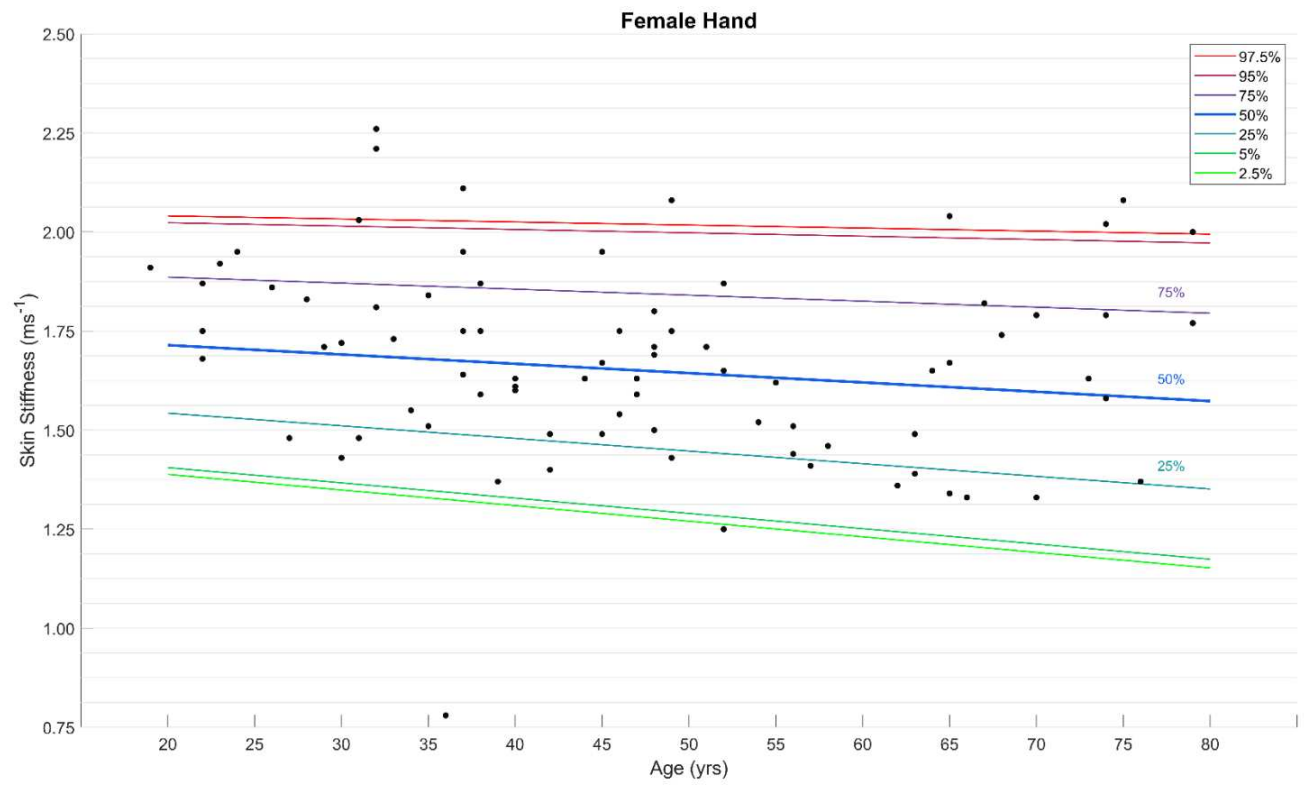

| Percentiles        | General equation for the estimate of the value for stiffness (at age X) | R <sup>2</sup> |
|--------------------|-------------------------------------------------------------------------|----------------|
| 2,5 <sup>th</sup>  | -0,004 + 1.47 (X)                                                       | 0,16           |
| 5 <sup>th</sup>    | -0,004 + 1.48 (X)                                                       | 0,16           |
| 25 <sup>th</sup>   | -0,003 + 1.61 (X)                                                       | 0,19           |
| 50 <sup>th</sup>   | -0,002 + 1.76 (X)                                                       | 0,18           |
| 75 <sup>th</sup>   | -0,002 + 1.92 (X)                                                       | 0,06           |
| 95 <sup>th</sup>   | -0,001 + 2.04 (X)                                                       | 0,01           |
| 97.5 <sup>th</sup> | -0.001 + 2.06 (X)                                                       | 0,01           |

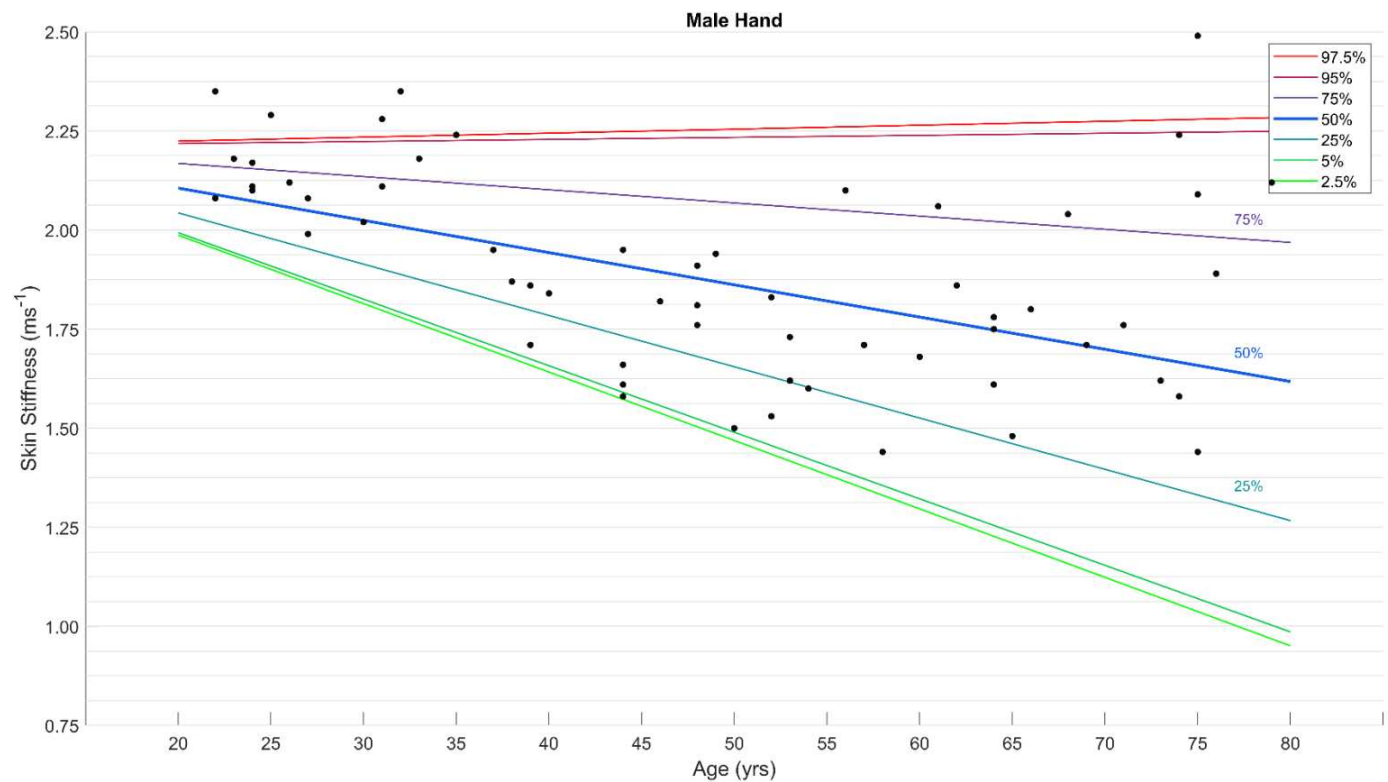

| Percentiles        | General equation for the estimate of the value for stiffness (at age X) | R <sup>2</sup> |
|--------------------|-------------------------------------------------------------------------|----------------|
| 2,5 <sup>th</sup>  | -0,017 + 2.33 (X)                                                       | 0,79           |
| 5 <sup>th</sup>    | -0,017 + 2.33 (X)                                                       | 0,80           |
| 25 <sup>th</sup>   | -0,013 + 2.30 (X)                                                       | 0,83           |
| 50 <sup>th</sup>   | -0,008 + 2.27 (X)                                                       | 0,73           |
| 75 <sup>th</sup>   | -0,003 + 2.23 (X)                                                       | 0,16           |
| 95 <sup>th</sup>   | 0,001 + 2.21 (X)                                                        | 0,00           |
| 97.5 <sup>th</sup> | 0.001 + 2.20 (X)                                                        | 0,01           |

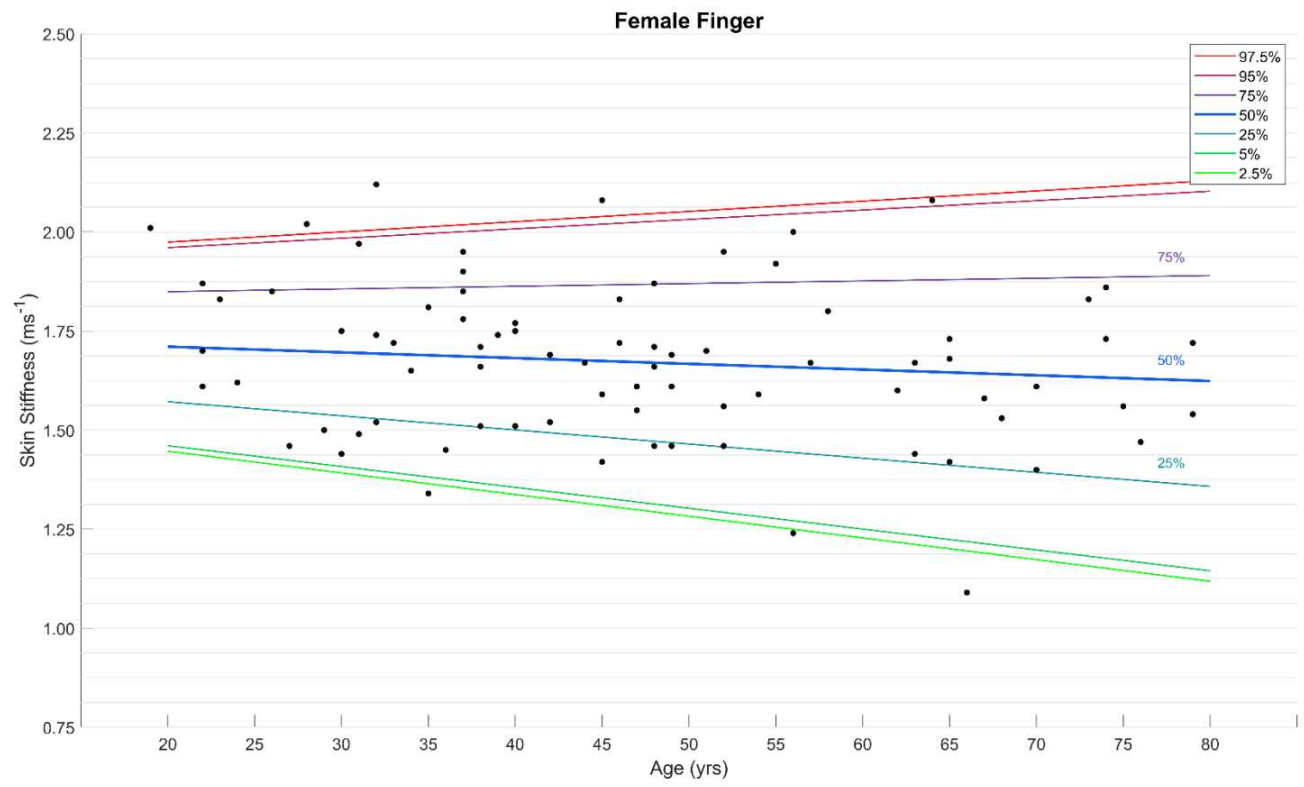

| Percentiles        | General equation for the estimate of the value for stiffness (at age X) | R <sup>2</sup> |
|--------------------|-------------------------------------------------------------------------|----------------|
| 2,5 <sup>th</sup>  | -0,005 + 1.56 (X)                                                       | 0,85           |
| 5 <sup>th</sup>    | -0,005 + 1.57 (X)                                                       | 0,84           |
| 25 <sup>th</sup>   | -0,004 + 1.64 (X)                                                       | 0,74           |
| 50 <sup>th</sup>   | -0,001 + 1.74 (X)                                                       | 0,21           |
| 75 <sup>th</sup>   | 0,001 + 1.84 (X)                                                        | 0,03           |
| 95 <sup>th</sup>   | 0,002 + 1.91 (X)                                                        | 0,18           |
| 97.5 <sup>th</sup> | 0.003 + 1.92 (X)                                                        | 0,20           |

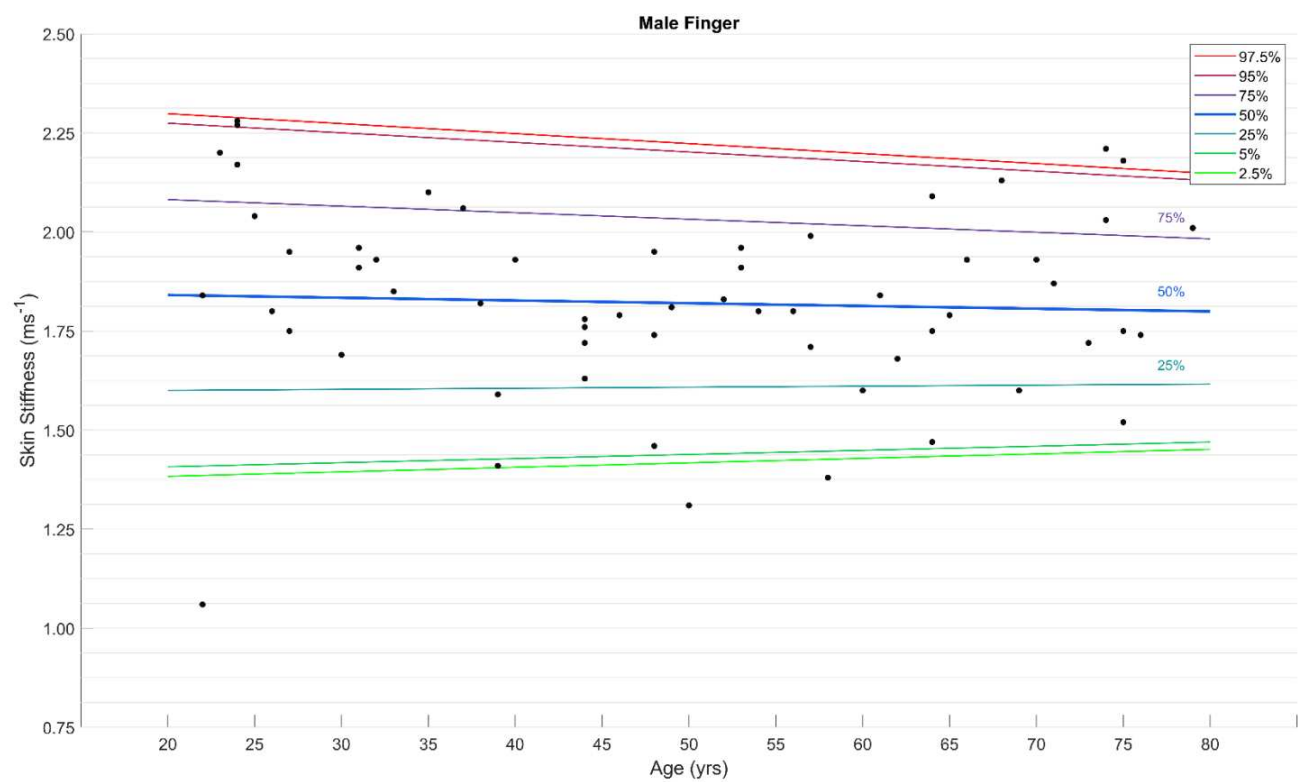

| Percentiles        | General equation for the estimate of the value for stiffness (at age X) | R <sup>2</sup> |
|--------------------|-------------------------------------------------------------------------|----------------|
| 2,5 <sup>th</sup>  | 0,001 + 1.36 (X)                                                        | 0,03           |
| 5 <sup>th</sup>    | 0,000 + 1.39 (X)                                                        | 0,03           |
| 25 <sup>th</sup>   | -0,001 + 1.59 (X)                                                       | 0,01           |
| 50 <sup>th</sup>   | -0,002 + 1.85 (X)                                                       | 0,04           |
| 75 <sup>th</sup>   | -0,002 + 2.11 (X)                                                       | 0,06           |
| 95 <sup>th</sup>   | -0,003 + 2.32 (X)                                                       | 0,06           |
| 97.5 <sup>th</sup> | -0.003 + 2.35 (X)                                                       | 0,06           |

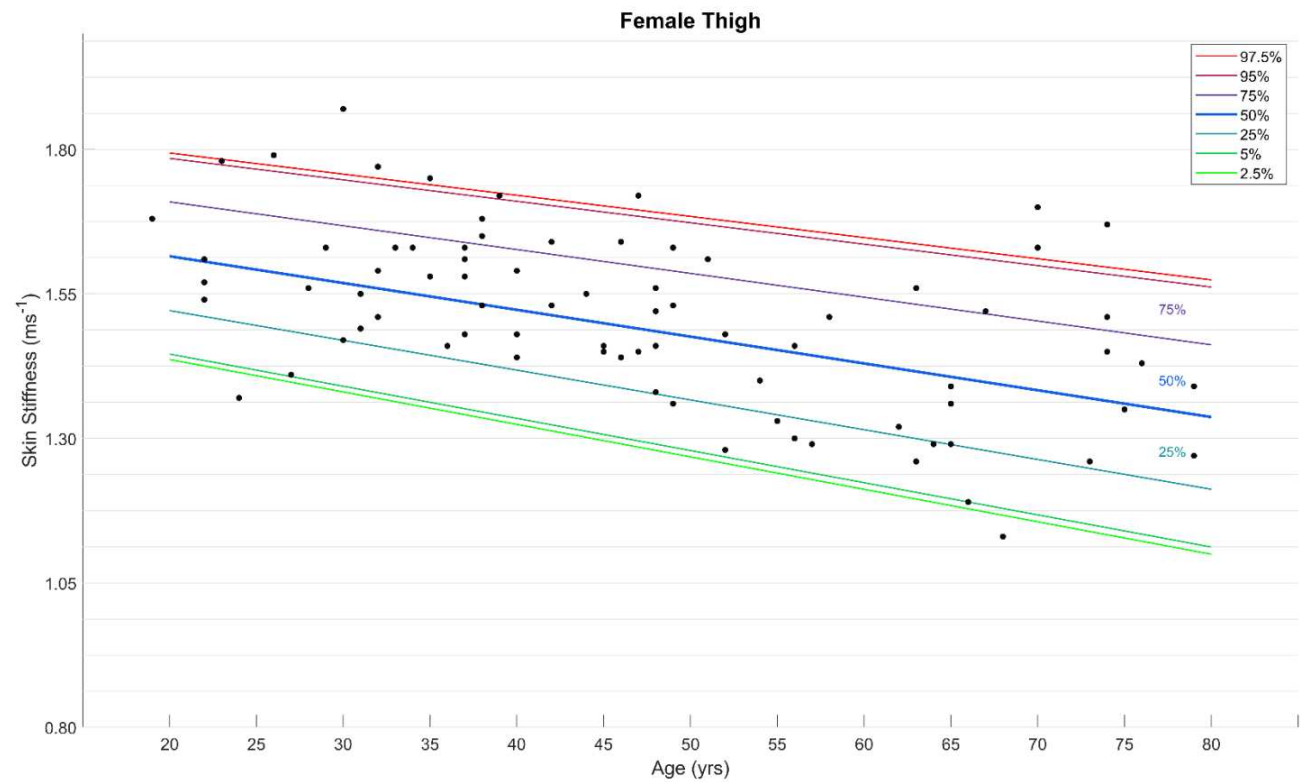

| Percentiles        | General equation for the estimate of the value for stiffness (at age X) | R²   |
|--------------------|-------------------------------------------------------------------------|------|
| 2,5 <sup>th</sup>  | -0,006 + 1.55 (X)                                                       | 0,77 |
| 5 <sup>th</sup>    | -0,006 + 1.56 (X)                                                       | 0,77 |
| 25 <sup>th</sup>   | -0,005 + 1.62 (X)                                                       | 0,73 |
| 50 <sup>th</sup>   | -0,005 + 1.71 (X)                                                       | 0,64 |
| 75 <sup>th</sup>   | -0,004 + 1.79 (X)                                                       | 0,52 |
| 95 <sup>th</sup>   | -0,004 + 1.86 (X)                                                       | 0,42 |
| 97.5 <sup>th</sup> | -0.004 + 1.87 (X)                                                       | 0,40 |

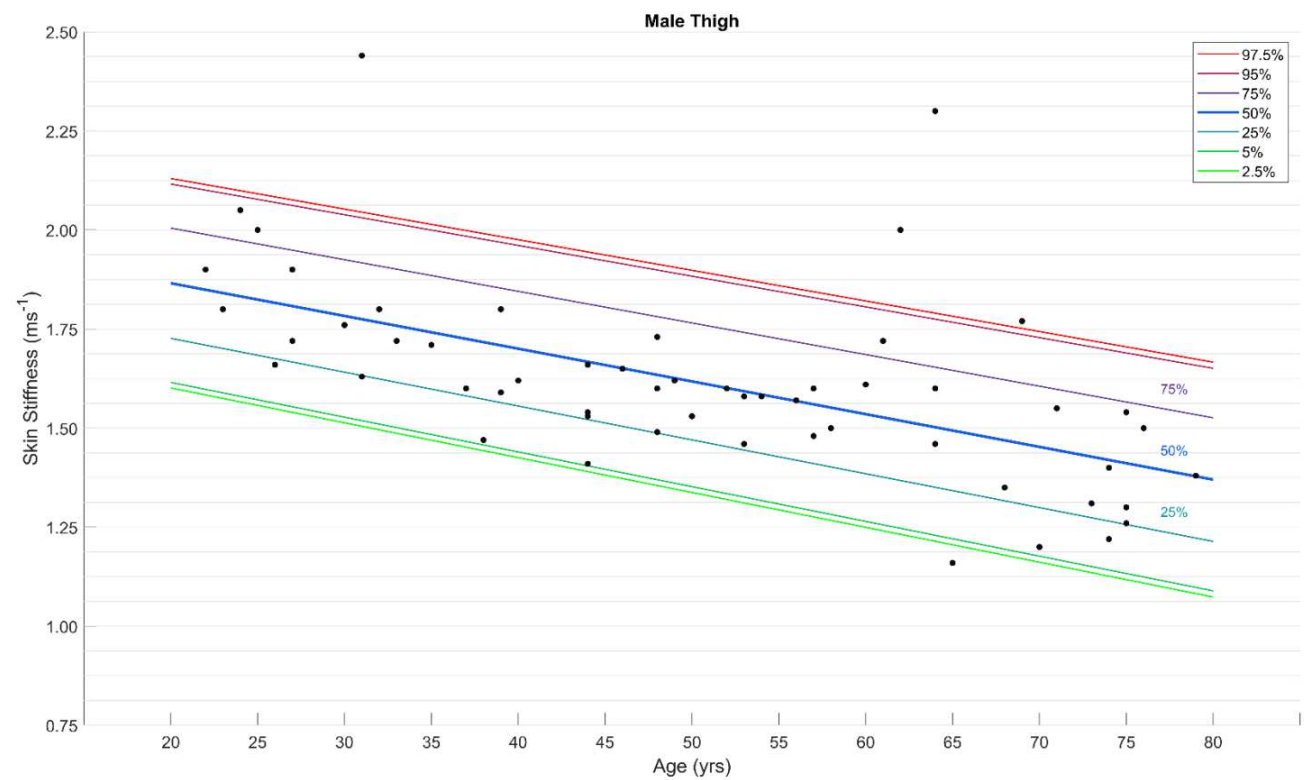

| Percentiles        | General equation for the estimate of the value for stiffness (at age X) | R <sup>2</sup> |
|--------------------|-------------------------------------------------------------------------|----------------|
| 2,5 <sup>th</sup>  | -0,009 + 1.78 (X)                                                       | 0,63           |
| 5 <sup>th</sup>    | -0,009 + 1.79 (X)                                                       | 0,66           |
| 25 <sup>th</sup>   | -0,009 + 1.90 (X)                                                       | 0,89           |
| 50 <sup>th</sup>   | -0,008 + 2.03 (X)                                                       | 0,80           |
| 75 <sup>th</sup>   | -0,008 + 2.16 (X)                                                       | 0,45           |
| 95 <sup>th</sup>   | -0,008 + 2.27 (X)                                                       | 0,27           |
| 97.5 <sup>th</sup> | -0.008 + 2.28 (X)                                                       | 0,26           |

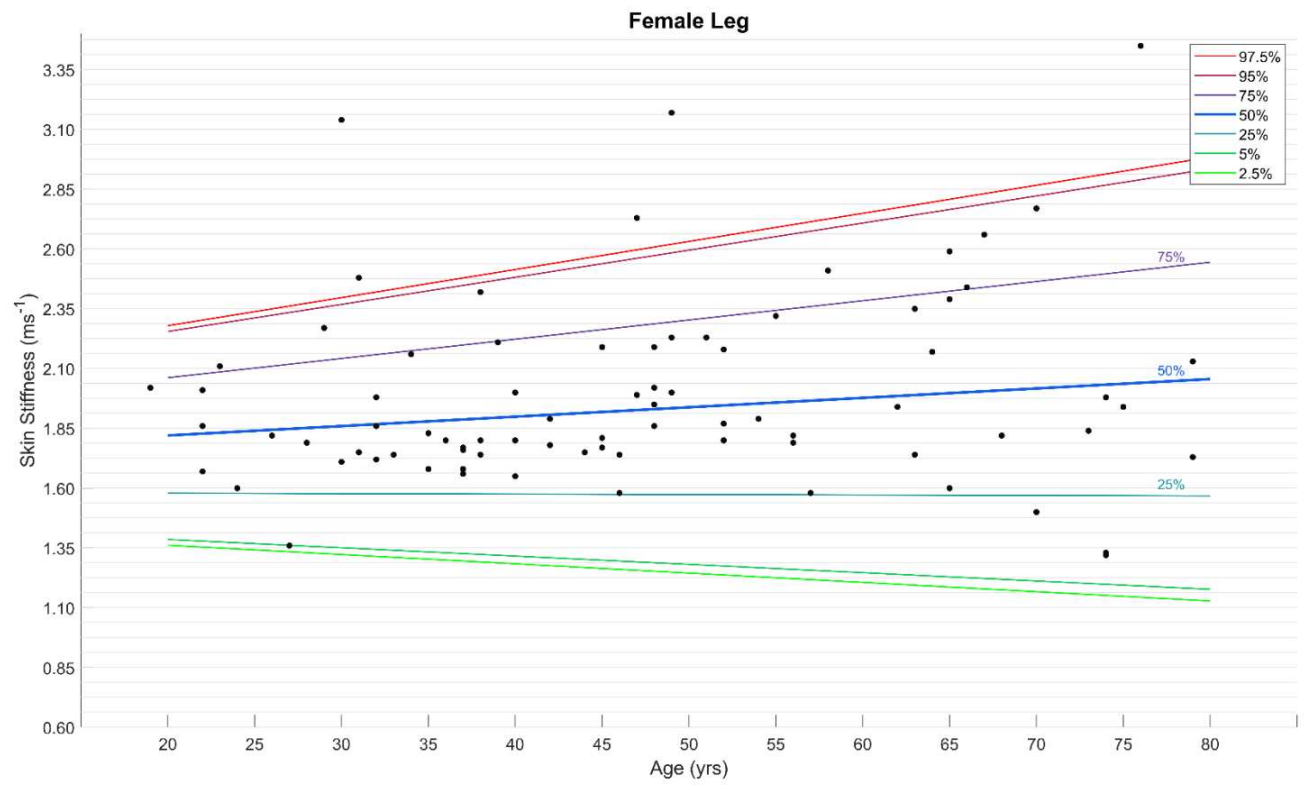

| Percentiles        | General equation for the estimate of the value for stiffness at age X) | R²   |
|--------------------|------------------------------------------------------------------------|------|
| 2,5 <sup>th</sup>  | -0,004 + 1.44 (X)                                                      | 0,06 |
| 5 <sup>th</sup>    | -0,003 + 1.46 (X)                                                      | 0,05 |
| 25 <sup>th</sup>   | 0,000 + 1.58 (X)                                                       | 0,00 |
| 50 <sup>th</sup>   | 0,004 + 1.74 (X)                                                       | 0,36 |
| 75 <sup>th</sup>   | 0,008 + 1.90 (X)                                                       | 0,80 |
| 95 <sup>th</sup>   | 0,011 + 2.03 (X)                                                       | 0,70 |
| 97.5 <sup>th</sup> | 0.012 + 2.04 (X)                                                       | 0,69 |

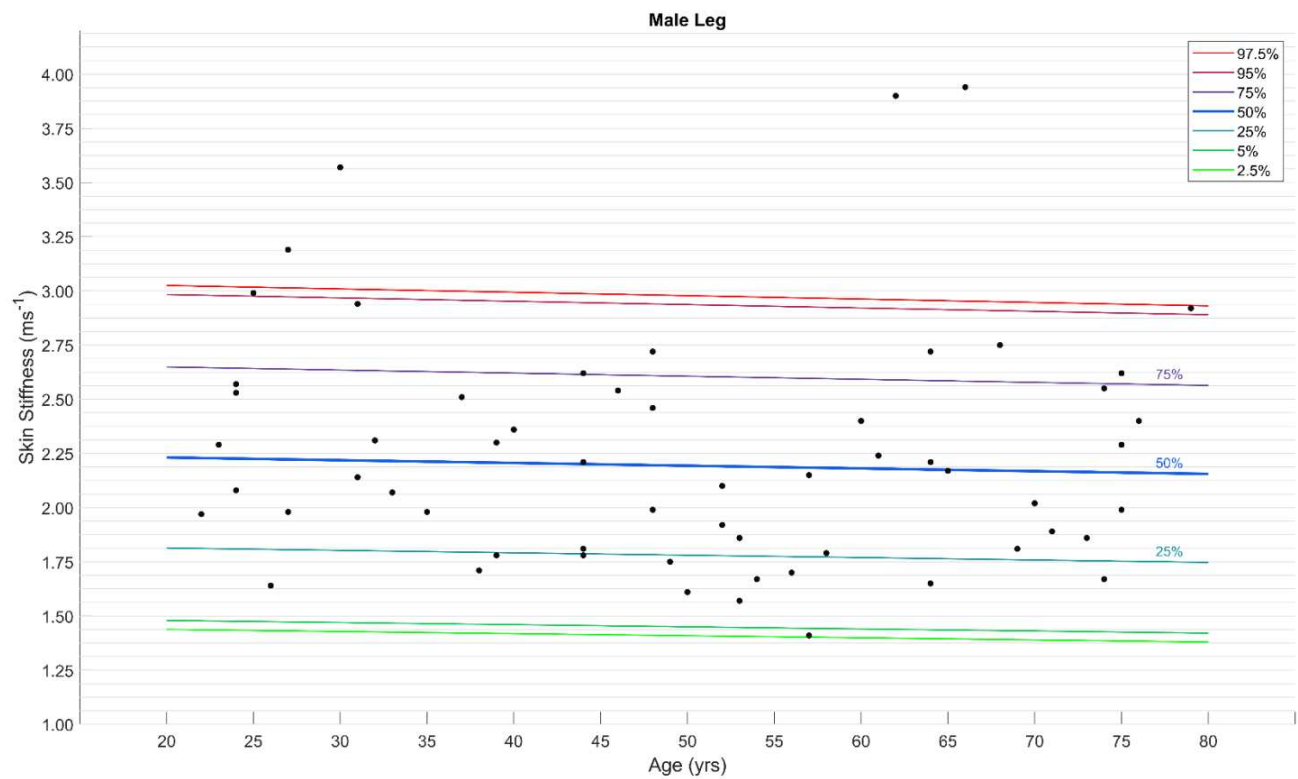

| Percentiles        | General equation for the estimate of the value for stiffness (at age X) | R <sup>2</sup> |
|--------------------|-------------------------------------------------------------------------|----------------|
| 2,5 <sup>th</sup>  | -0,001 + 1.46 (X)                                                       | 0,02           |
| 5 <sup>th</sup>    | -0,001 + 1.50 (X)                                                       | 0,02           |
| 25 <sup>th</sup>   | -0,001 + 1.84 (X)                                                       | 0,03           |
| 50 <sup>th</sup>   | -0,001 + 2.26 (X)                                                       | 0,01           |
| 75 <sup>th</sup>   | -0,001 + 2.68 (X)                                                       | 0,00           |
| 95 <sup>th</sup>   | -0,002 + 3.01 (X)                                                       | 0,00           |
| 97.5 <sup>th</sup> | -0.002 + 3.06 (X)                                                       | 0,00           |



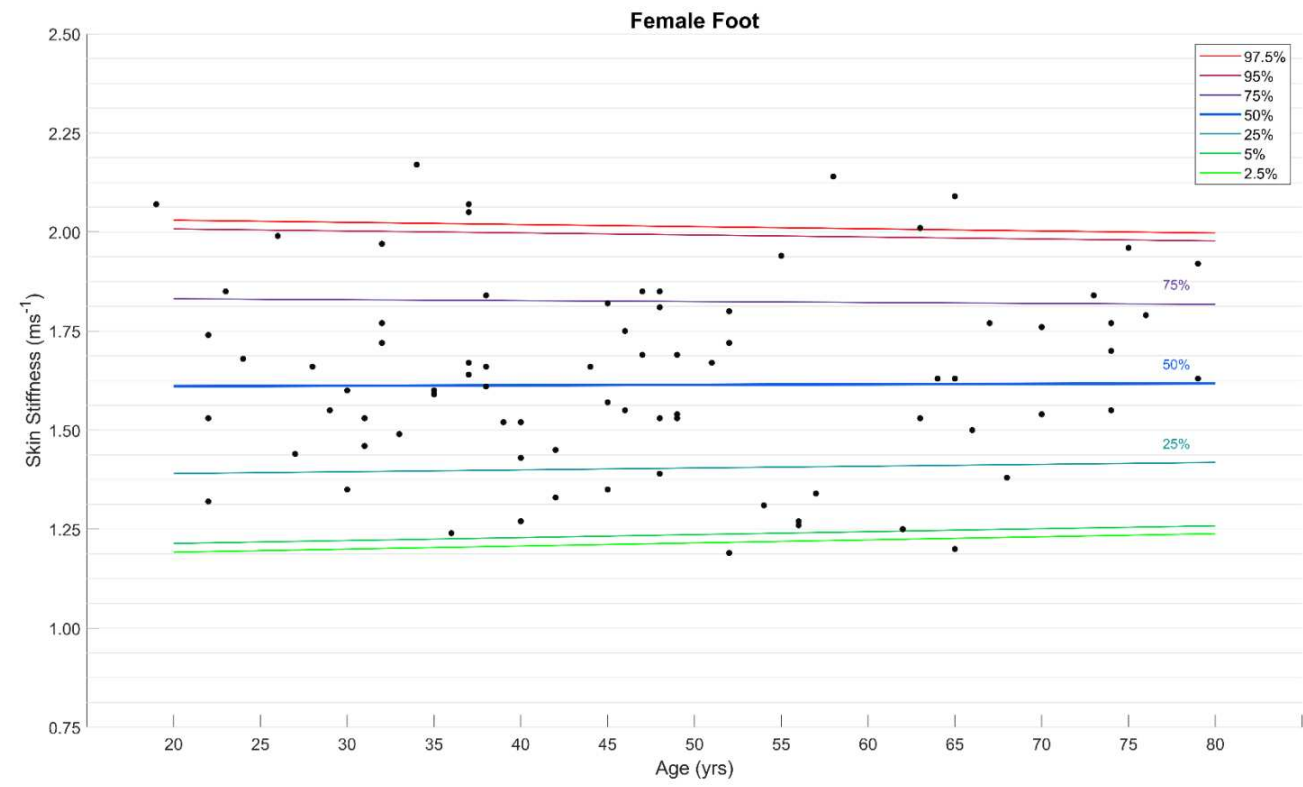

| Percentiles        | General equation for the estimate of the value for stiffness (at age X) | R²   |
|--------------------|-------------------------------------------------------------------------|------|
| 2,5 <sup>th</sup>  | 0,001 + 1.18 (X)                                                        | 0,01 |
| 5 <sup>th</sup>    | 0,001 + 1.20 (X)                                                        | 0,01 |
| 25 <sup>th</sup>   | 0,000 + 1.38 (X)                                                        | 0,00 |
| 50 <sup>th</sup>   | 0,000 + 1.61 (X)                                                        | 0,00 |
| 75 <sup>th</sup>   | 0,000 + 1.84 (X)                                                        | 0,01 |
| 95 <sup>th</sup>   | -0,001 + 2.02 (X)                                                       | 0,01 |
| 97.5 <sup>th</sup> | -0.001 + 2.04 (X)                                                       | 0,01 |

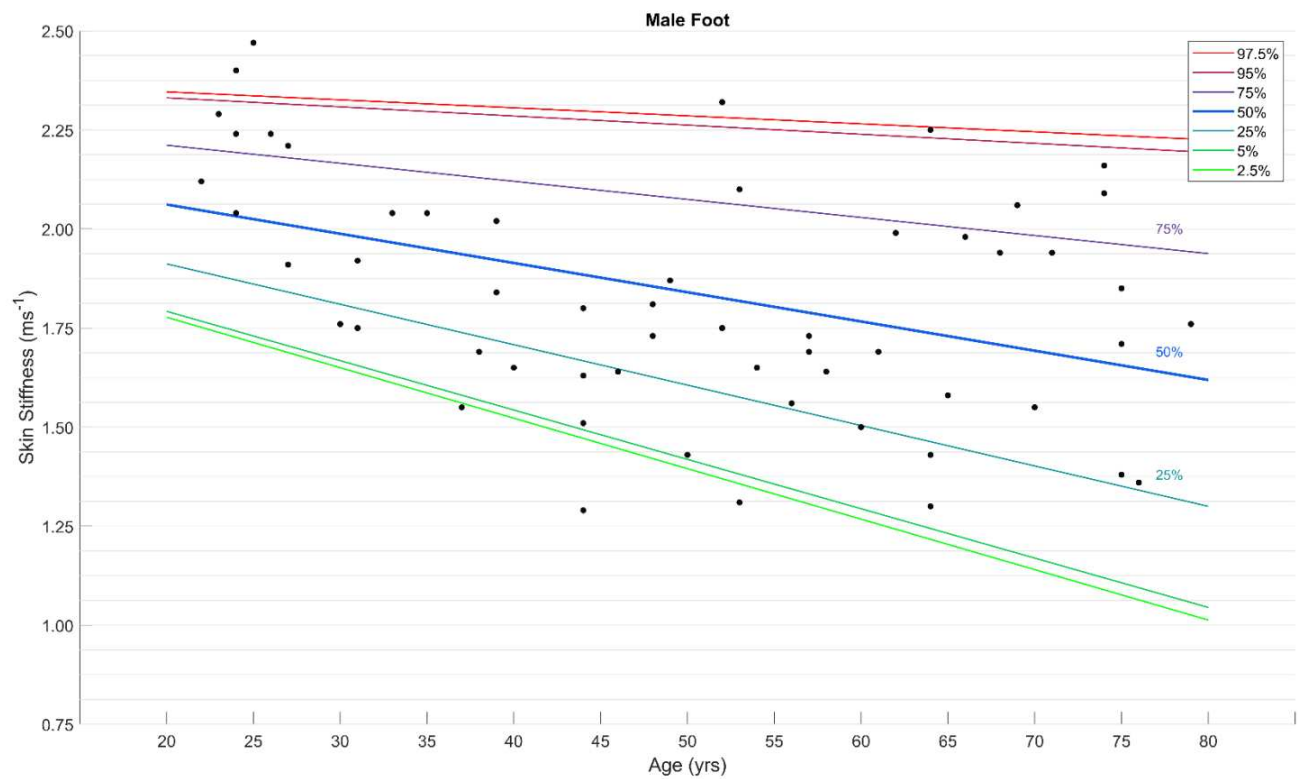

| Percentiles        | General equation for the estimate of the value for stiffness (at age X) | R <sup>2</sup> |
|--------------------|-------------------------------------------------------------------------|----------------|
| 2,5 <sup>th</sup>  | -0,013 + 2.03 (X)                                                       | 0,74           |
| 5 <sup>th</sup>    | -0,012 + 2.04 (X)                                                       | 0,74           |
| 25 <sup>th</sup>   | -0,01 + 2.12 (X)                                                        | 0,64           |
| 50 <sup>th</sup>   | -0,007 + 2.21 (X)                                                       | 0,43           |
| 75 <sup>th</sup>   | -0,005 + 2.30 (X)                                                       | 0,18           |
| 95 <sup>th</sup>   | -0,002 + 2.38 (X)                                                       | 0,04           |
| 97.5 <sup>th</sup> | -0.002 + 2.39 (X)                                                       | 0,03           |
